# Supplementary material
Source: publisher figshare collection journal article supplement (https://acs.figshare.com/ndownloader/files/4076716)

## The Hünlich Base – (Re)Discovery, Synthesis and Structure Elucidation after a Century

Stephan Rigol,<sup>†</sup> Lothar Beyer,<sup>‡</sup> Lothar Hennig,<sup>†</sup> Joachim Sieler,<sup>‡</sup> and Athanassios Giannis<sup>\*,†</sup>

<sup>†</sup> Institut für Organische Chemie, Fakultät für Chemie und Mineralogie, Universität Leipzig, Johannisallee 29, 04103 Leipzig, Germany

<sup>‡</sup> Institut für Anorganische Chemie, Fakultät für Chemie und Mineralogie, Universität Leipzig, Johannisallee 29, 04103 Leipzig, Germany

\*e-mail: giannis@uni-leipzig.de (A.Giannis)

### Table of Contents

|                                                                                                                                                                                                                                                                  |                |
|------------------------------------------------------------------------------------------------------------------------------------------------------------------------------------------------------------------------------------------------------------------|----------------|
| General Experimental Methods .....                                                                                                                                                                                                                               | <b>S2</b>      |
| Synthesis and characterization of Hünlich's base <b>3</b> .....                                                                                                                                                                                                  | <b>S3</b>      |
| Synthesis and characterization of di- <i>tert</i> -butyl [(5,13-dimethyl-1,9-diazatetracyclo[7.7.1.0 <sup>2,7</sup> .0 <sup>10,15</sup> ]-heptadeca-2,4,6,10,12,14-hexaene-4,12-diyl)bis{imino[(2S)-1-oxo-3-phenylpropane-1,2-diyl]}]biscarbamate <b>7</b> ..... | <b>S4-S5</b>   |
| Synthesis and characterization of di- <i>tert</i> -butyl [(5,13-dimethyl-1,9-diazatetracyclo[7.7.1.0 <sup>2,7</sup> .0 <sup>10,15</sup> ]-heptadeca-2,4,6,10,12,14-hexaene-4,12-diyl)bis{imino[(2S)-3-methyl-1-oxobutane-1,2-diyl]}]biscarbamate <b>8</b> .....  | <b>S6-S7</b>   |
| Synthesis and characterization of 3,9-diazo-2,8-dimethyl-6 <i>H</i> ,12 <i>H</i> -5,11-methanodibenzo[ <i>b,f</i> ]-[1,5]diazocine <b>9</b> .....                                                                                                                | <b>S8</b>      |
| Synthesis and characterization of 3,9-diiodo-2,8-dimethyl-6 <i>H</i> ,12 <i>H</i> -5,11-methanodibenzo[ <i>b,f</i> ]-[1,5]diazocine <b>10</b> .....                                                                                                              | <b>S9</b>      |
| Synthesis and characterization of 3-azido-2,8-dimethyl-9-(4-phenyl-1 <i>H</i> -1,2,3-triazol-1-yl)-6 <i>H</i> ,12 <i>H</i> -5,11-methanodibenzo[ <i>b,f</i> ][1,5]diazocine <b>11</b> .....                                                                      | <b>S10</b>     |
| Synthesis and characterization of 3-azido-9-(4-hexyl-1 <i>H</i> -1,2,3-triazol-1-yl)-2,8-dimethyl-6 <i>H</i> ,12 <i>H</i> -5,11-methanodibenzo[ <i>b,f</i> ][1,5]diazocine <b>12</b> .....                                                                       | <b>S11</b>     |
| Proposed structures for the synthesized base by Walter Hünlich .....                                                                                                                                                                                             | <b>S12</b>     |
| Cover of W. Hünlich's Ph.D. work .....                                                                                                                                                                                                                           | <b>S13</b>     |
| <sup>1</sup> H and <sup>13</sup> C spectra for <b>3</b> .....                                                                                                                                                                                                    | <b>S14-S15</b> |
| <sup>1</sup> H and <sup>13</sup> C spectra for <b>7a</b> and <b>7a'</b> .....                                                                                                                                                                                    | <b>S16-S19</b> |
| <sup>1</sup> H and <sup>13</sup> C spectra for <b>8a</b> and <b>8a'</b> .....                                                                                                                                                                                    | <b>S20-S23</b> |
| <sup>1</sup> H and <sup>13</sup> C spectra for <b>9</b> .....                                                                                                                                                                                                    | <b>S24-S25</b> |
| <sup>1</sup> H and <sup>13</sup> C spectra for <b>10</b> .....                                                                                                                                                                                                   | <b>S26-S27</b> |
| <sup>1</sup> H and <sup>13</sup> C spectra for <b>11</b> .....                                                                                                                                                                                                   | <b>S28-S29</b> |
| <sup>1</sup> H and <sup>13</sup> C spectra for <b>12</b> .....                                                                                                                                                                                                   | <b>S30-S31</b> |

## Experimental Section

### General Experimental Methods.

All reactions were run under an atmosphere of argon unless otherwise indicated. Room temperature refers to 22 °C, ambient pressure to 1013 hPa. Reagents and anhydrous solvents were transferred via oven-dried syringe or cannula. Flasks were flame-dried under vacuum and cooled under a constant stream of argon. Tetrahydrofuran (THF) was distilled under argon from potassium, dichloromethane from SICAPENT (phosphorus pentoxide on solid support with indicator). Acetone, acetonitrile and pyridine were purchased from Acros or Aldrich (anhydrous over molecular sieves). All other chemicals were purchased from ABCR, Acros, Aldrich, Alfa Aesar, Fluorochem, TCI Europe and VWR at highest commercially available purity and used as such. Reactions were monitored by thin layer chromatography using Merck silica gel 60 F<sub>254</sub> TLC aluminium sheets and visualized under an UV lamp and/or with ceric ammonium molybdate, potassium permanganate or vanillin staining solution. Chromatographic purification was performed as flash chromatography on Acros silica gel 35-70, 60 Å, using a forced flow of eluent (method of Still) or as preparative TLC on Merck silica gel 60 F<sub>254</sub> glass plates with concentration zone. Concentration under reduced pressure was performed by rotary evaporation at 40 °C at the appropriate pressure. NMR spectra were recorded on a Varian Mercury plus 300 (operating at 300 MHz for <sup>1</sup>H and 75 MHz for <sup>13</sup>C acquisitions), a Varian Mercury plus 400 (operating at 400 MHz for <sup>1</sup>H, 100 MHz for <sup>13</sup>C), and a Bruker Avance-700 (operating at 700 MHz for <sup>1</sup>H, 175 MHz for <sup>13</sup>C). Chemical shifts  $\delta$  are reported in ppm with the solvent resonance as internal standard (chloroform-*d*<sub>1</sub>: 7.26 (<sup>1</sup>H-NMR), 77.16 (<sup>13</sup>C-NMR); methanol-*d*<sub>4</sub>: 3.31 (<sup>1</sup>H-NMR), 49.00 (<sup>13</sup>C-NMR). Coupling constants *J* are given in Hertz (Hz). Multiplicities are classified by the following abbreviations: s = singlet, d = doublet, t = triplet and combinations thereof, or m = multiplet or br = broad signal. High resolution mass spectra were obtained on a Bruker Daltonics ESI-FT-ICR-MS APEX II [7 T]. IR spectra were obtained on an ATI/MATTSON Genesis FT-IR as thin film or KBr disk. Absorbance frequencies are reported in reciprocal centimeters (cm<sup>-1</sup>). Melting points were measured with a Büchi "Melting Point B-540" and are uncorrected. Optical rotation data was obtained with a Schmidt+Haensch Polartronic MHZ-8 at the sodium-D line (589 nm) using a 50 mm path-length cell in the solvent and concentration indicated.

**2,8-dimethyl-6H,12H-5,11-methanodibenzo[*b,f*][1,5]diazocine-3,9-diamine (Hünlich's base)**

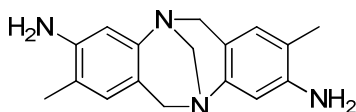

**3**

Formaldehyde (37 % in H<sub>2</sub>O, 10.9 ml, 11.9 g, 146 mmol, 1.00 eq.) was added dropwise to a solution of 2,4-diaminotoluene (36.6 g, 300 mmol, 2.05 eq.) in aqueous sulfuric acid (5 %, 1000 ml). After the reaction was stirred for 36 h ammonia (25 %, 300 ml) was added and the precipitated crude product was separated by filtration. Purification was achieved by dissolving the raw material in hot methanol (150 ml) and slow addition of hot water (30-45 ml). Filtration yielded Hünlich's base (13.5 g, 48.3 mmol, 33 %) as light brown solid.

**R<sub>f</sub>**: 0.43 (dichloromethane/methanol = 10:1 v/v)

**<sup>1</sup>H-NMR**: (400 MHz, CDCl<sub>3</sub>) δ [ppm] 2.04 (s, 6H, 2 × -CH<sub>3</sub>), 3.48 (br, 4H, 2 × -NH<sub>2</sub>), 4.02 (d, <sup>2</sup>J<sub>H,H</sub> = 16.0 Hz, 2H, **H-6a**, **H-12a**), 4.25 (s, 2H, -N-CH<sub>2</sub>-N-), 4.55 (d, <sup>2</sup>J<sub>H,H</sub> = 16.0 Hz, 2H, **H-6b**, **H-12b**), 6.43 (s, 2H, **H-4**, **H-10**), 6.55 (s, 2H, **H-1**, **H-7**).

**<sup>13</sup>C-NMR**: (100 MHz, CDCl<sub>3</sub>) δ [ppm] 17.1 (2 × -CH<sub>3</sub>), 58.5 (**C-6**, **C-12**), 67.4 (**C-13**), 110.8 (**C-4**, **C-10**), 118.0 (**C-6a**, **C-12a**), 119.4 (**C-2**, **C-8**), 128.6 (**C-1**, **C-7**), 143.9 (**C-3**, **C-9**), 147.4 (**C-4a**, **C-10a**).

**HR-MS**: (ESI positive, CH<sub>3</sub>OH) calc. for [C<sub>17</sub>H<sub>21</sub>N<sub>4</sub>]<sup>+</sup>: [M+H]<sup>+</sup> 281.17607, found 281.17590.

**UV**: (CH<sub>3</sub>OH) λ (lgε) = 221 nm (4.581), 301 (3.904).

**IR**: (KBr) ν<sub>max</sub> = 3409 cm<sup>-1</sup>, 3347, 1630, 1574, 1500, 1180, 1087, 916, 875.

**Optical rotation**: enantiomer 1: [α]<sub>D</sub><sup>22</sup> (deg cm<sup>3</sup> g<sup>-1</sup> dm<sup>-1</sup>) = +58.0 (c = 1.0, CH<sub>3</sub>OH)  
enantiomer 2: [α]<sub>D</sub><sup>22</sup> (deg cm<sup>3</sup> g<sup>-1</sup> dm<sup>-1</sup>) = -63.0 (c = 0.33, CH<sub>3</sub>OH)

**Melting point**: 225-230 °C

Resolution of both enantiomers was achieved via the amino acid derivatives (**7a**, **7a'** or **8a**, **8a'** respectively) by basic hydrolysis. Example for hydrolysis of **8a** to form enantiomer 1 of Hünlich's base (**3a**):

To a solution of compound **8a** (100 mg, 0.147 mmol) in THF (3.0 ml) was added saturated aqueous KOH (3.0 ml) solution. The reaction mixture was stirred at 120 °C in a sealed Pyrex tube for 48 h. After cooling to rt and solvent removal the crude product was purified by column chromatography to furnish enantiomer 1 of Hünlich's base (39.2 mg, 0.140 mmol, 95 %).

**di-*tert*-butyl [(5,13-dimethyl-1,9-diazatetracyclo[7.7.1.0<sup>2,7</sup>.0<sup>10,15</sup>]heptadeca-2,4,6,10,12,14-hexaene-4,12-diyl)bis{imino[(2*S*)-1-oxo-3-phenylpropane-1,2-diyl]}]biscarbamate**

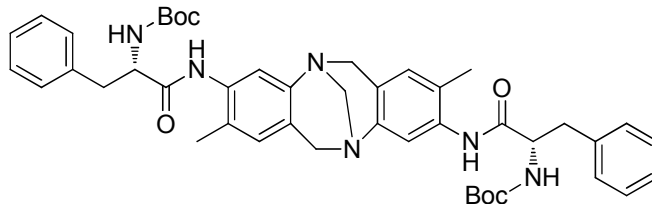

**7**

Hünlich's base (841 mg, 3.00 mmol, 1 eq.), *N*-[(1,1-dimethylethoxy)carbonyl]-L-phenylalanine (1.59 g, 6.00 mmol, 2 eq.) and 2-ethoxy-2*H*-quinoline-1-carboxylic acid ethyl ester (1.85 g, 7.50 mmol, 2.5 eq.) were dissolved in chloroform (150 ml) before triethylamine (1.05 ml, 759 mg, 7.50 mmol, 2.5 eq.) was added and the mixture was heated to reflux for twelve hours. Then, the solvent was removed under reduced pressure and the residue was taken up in ethyl acetate (60 ml), washed twice with water (60 ml) and dried over Na<sub>2</sub>SO<sub>4</sub> before all volatiles were removed under reduced pressure. Purification was achieved by column chromatography to yield the titled compound (1.58 g, 2.04 mmol, 68 %) as white solid. Separation of diastereomers was accomplished by HPLC (Nucleosil 50-7, chloroform/methanol 99:1 → 9:1).

#### diastereomer 1:

**R<sub>f</sub>**: 0.37 (dichloromethane/methanol = 10:1 v/v)

**<sup>1</sup>H-NMR:** (300 MHz, CDCl<sub>3</sub>) δ [ppm] 1.42 (s, 18H, 2 × -C(CH<sub>3</sub>)<sub>3</sub>), 1.89 (s, 6H, 2 × CH<sub>3</sub>), 3.14-3.17 (m, 4H, 2 × Ph-CH<sub>2</sub>-), 4.11 (d, <sup>2</sup>J<sub>H,H</sub> = 16.2 Hz, 2H, **H-8a**, **H-16a**), 4.25 (s, 2H, -N-CH<sub>2</sub>-N-), 4.44 (dd, <sup>3</sup>J<sub>H,H</sub> = 14.7, 7.2 Hz, 2H, 2 × -CH-NH-), 4.57 (d, <sup>2</sup>J<sub>H,H</sub> = 16.5 Hz, 2H, **H-8b**, **H-16b**), 5.07 (br, 2H, 2 × -O-CO-NH), 6.64 (s, 2H, **H-6**, **H-14**), 7.22-7.34 (m, 10H, 10 × H<sub>Ph</sub>), 7.44 (br, 2H, 2 × CO-NH), 7.65 (s, 2H, **H-3**, **H-11**).

**<sup>13</sup>C-NMR:** (75 MHz, CDCl<sub>3</sub>) δ [ppm] 17.0 (2 × -CH<sub>3</sub>), 28.4 (2 × -C(CH<sub>3</sub>)<sub>3</sub>), 38.1 (2 × Ph-CH<sub>2</sub>-), 57.0 (2 × -CH-NH-), 58.4 (**C-8**, **C-16**), 67.1 (-N-CH<sub>2</sub>-N-), 80.7 (2 × -C(CH<sub>3</sub>)<sub>3</sub>), 118.5 (**C-3**, **C-11**), 124.5 (**C-5**, **C-7**, **C-13**, **C-15**), 127.3 (**C<sub>Ph</sub>-4**, **C<sub>Ph</sub>-4'**), 128.6 (**C-6**, **C-14**), 129.0 (**C<sub>Ph</sub>-3**, **C<sub>Ph</sub>-3'**, **C<sub>Ph</sub>-3''**, **C<sub>Ph</sub>-3'''**), 129.4 (**C<sub>Ph</sub>-2**, **C<sub>Ph</sub>-2'**, **C<sub>Ph</sub>-2''**, **C<sub>Ph</sub>-2'''**), 134.5 (**C-4**, **C-12**), 136.8 (**C<sub>Ph</sub>-1**, **C<sub>Ph</sub>-1'**), 146.6 (**C-2**, **C-10**), 155.8 (2 × NH-CO-O), 169.4 (2 × NH-CO).

**HR-MS:** (ESI positive, CH<sub>3</sub>OH) calc. for [C<sub>45</sub>H<sub>55</sub>N<sub>6</sub>O<sub>6</sub>]<sup>+</sup>: [M+H]<sup>+</sup> 775.41780, found 775.41840, calc. for [C<sub>45</sub>H<sub>54</sub>N<sub>6</sub>O<sub>6</sub>Na]<sup>+</sup>: [M+Na]<sup>+</sup> 797.39970, found 797.39998, calc. for [C<sub>45</sub>H<sub>54</sub>N<sub>6</sub>O<sub>6</sub>K]<sup>+</sup>: [M+K]<sup>+</sup> 813.37400, found 813.37460.

**UV:** (CH<sub>2</sub>Cl<sub>2</sub>) λ (lgε) = 231 nm (4.458), 243 (4.439), 298 (3.735).

**IR:** (KBr) ν<sub>max</sub> = 3422 cm<sup>-1</sup>, 2976, 2928, 1692, 1522, 1497, 1454, 1367, 1168, 921, 701.

**Optical rotation:** [α]<sub>D</sub><sup>22</sup> (deg cm<sup>3</sup> g<sup>-1</sup> dm<sup>-1</sup>) = +79.9 (c = 1.0, CHCl<sub>3</sub>)

**Melting point:** 205-206 °C

**diastereomer 2:**

**R<sub>f</sub>:** 0.36 (dichloromethane/methanol = 10:1 v/v)

**<sup>1</sup>H-NMR:** (400 MHz, CDCl<sub>3</sub>) δ [ppm] 1.43 (s, 18H, 2 × -C(CH<sub>3</sub>)<sub>3</sub>), 1.88 (s, 6H, 2 × CH<sub>3</sub>), 3.09-3.23 (m, 4H, 2 × Ph-CH<sub>2</sub>-), 4.11 (d, <sup>2</sup>J<sub>H,H</sub> = 16.8 Hz, 2H, **H-8a**, **H-16a**), 4.25 (s, 2H, -N-CH<sub>2</sub>-N-), 4.45 (dd, <sup>3</sup>J<sub>H,H</sub> = 13.8, 7.0 Hz, 2H, 2 × -CH-NH-), 4.57 (d, <sup>2</sup>J<sub>H,H</sub> = 16.4 Hz, 2H, **H-8b**, **H-16b**), 5.08 (br, 2H, 2 × -O-CO-NH), 6.64 (s, 2H, **H-6**, **H-14**), 7.25-7.34 (m, 10H, 10 × H<sub>Ph</sub>), 7.47 (br, 2H, 2 × CO-NH), 7.65 (s, 2H, **H-3**, **H-11**).

**<sup>13</sup>C-NMR:** (100 MHz, CDCl<sub>3</sub>) δ [ppm] 16.9 (2 × -CH<sub>3</sub>), 28.4 (2 × -C(CH<sub>3</sub>)<sub>3</sub>), 38.1 (2 × Ph-CH<sub>2</sub>-), 56.8 (2 × -CH-NH-), 58.4 (**C-8**, **C-16**), 67.1 (-N-CH<sub>2</sub>-N-), 80.8 (2 × -C(CH<sub>3</sub>)<sub>3</sub>), 118.7 (**C-3**, **C-11**), 124.6 (**C-5**, **C-7**, **C-13**, **C-15**), 127.3 (**C<sub>Ph</sub>-4**, **C<sub>Ph</sub>-4'**), 128.6 (**C-6**, **C-14**), 129.1 (**C<sub>Ph</sub>-3**, **C<sub>Ph</sub>-3'**, **C<sub>Ph</sub>-3''**, **C<sub>Ph</sub>-3'''**), 129.5 (**C<sub>Ph</sub>-2**, **C<sub>Ph</sub>-2'**, **C<sub>Ph</sub>-2''**, **C<sub>Ph</sub>-2'''**), 134.4 (**C-4**, **C-12**), 136.7 (**C<sub>Ph</sub>-1**, **C<sub>Ph</sub>-1'**), 146.4 (**C-2**, **C-10**), 155.8 (2 × NH-CO-O), 169.4 (2 × NH-CO).

**HR-MS:** (ESI positive, CH<sub>3</sub>OH) calc. for [C<sub>45</sub>H<sub>55</sub>N<sub>6</sub>O<sub>6</sub>]<sup>+</sup>: [M+H]<sup>+</sup> 775.41780, found 775.41840, calc. for [C<sub>45</sub>H<sub>54</sub>N<sub>6</sub>O<sub>6</sub>Na]<sup>+</sup>: [M+Na]<sup>+</sup> 797.39970, found 797.39998, calc. for [C<sub>45</sub>H<sub>54</sub>N<sub>6</sub>O<sub>6</sub>K]<sup>+</sup>: [M+K]<sup>+</sup> 813.37400, found 813.37460.

**UV:** (CH<sub>2</sub>Cl<sub>2</sub>) λ (lgε) = 231 nm (4.565), 245 (4.542), 301 (3.746).

**IR:** (KBr) ν<sub>max</sub> = 3419 cm<sup>-1</sup>, 2977, 2930, 1691, 1519, 1496, 1454, 1367, 1168, 921, 700.

**Optical rotation:** [α]<sub>D</sub><sup>22</sup> (deg cm<sup>3</sup> g<sup>-1</sup> dm<sup>-1</sup>) = -50.1 (c = 0.50, CHCl<sub>3</sub>)

**Melting point:** 152-153 °C

**di-*tert*-butyl [(5,13-dimethyl-1,9-diazatetracyclo[7.7.1.0<sup>2,7</sup>.0<sup>10,15</sup>]heptadeca-2,4,6,10,12,14-hexaene-4,12-diyl)bis{imino[(2*S*)-3-methyl-1-oxobutane-1,2-diyl]}]biscarbamate**

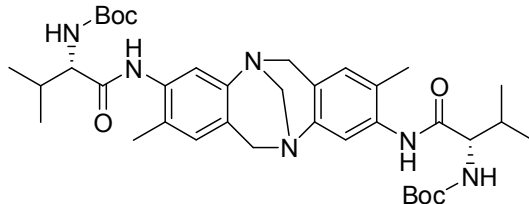

**8**

Hünlich's base (841 mg, 3.00 mmol, 1 eq.), *N*-[(1,1-dimethylethoxy)carbonyl]-L-valine (1.39 g, 6.00 mmol, 2 eq.) and 2-ethoxy-2*H*-quinoline-1-carboxylic acid ethyl ester (1.85 g, 7.50 mmol, 2.5 eq.) were dissolved in chloroform (150 ml) before triethylamine (1.05 ml, 759 mg, 7.50 mmol, 2.5 eq.) was added and the mixture was heated to reflux for twelve hours. Then, the solvent was removed under reduced pressure and the residue was taken up in ethyl acetate (60 ml), washed twice with water (60 ml) and dried over Na<sub>2</sub>SO<sub>4</sub> before all volatiles were removed under reduced pressure. Purification was achieved by column chromatography to yield the titled compound (1.51 g, 2.22 mmol, 74 %) as white solid. Separation of diastereomers was accomplished by HPLC (Nucleosil 50-7, chloroform/methanol 99:1 → 9:1).

#### diastereomer 1:

**R<sub>f</sub>**: 0.33 (chloroform/methanol = 50:1 v/v)

**<sup>1</sup>H-NMR:** (300 MHz, CDCl<sub>3</sub>) δ [ppm] 0.98 (d, <sup>3</sup>J<sub>H,H</sub> = 6.9 Hz, 6H, 2 × -CH-CH<sub>3</sub>), 1.03 (d, <sup>3</sup>J<sub>H,H</sub> = 6.9 Hz, 6H, 2 × -CH-CH<sub>3</sub>), 1.43 (s, 18H, 2 × -C(CH<sub>3</sub>)<sub>3</sub>), 2.09 (s, 6H, 2 × CH<sub>3</sub>), 2.21-2.31 (m, 2H, 2 × -CH(CH<sub>3</sub>)<sub>2</sub>), 4.00 (dd, <sup>3</sup>J<sub>H,H</sub> = 8.7, 6.6 Hz, 2H, 2 × -CH-NH-), 4.11 (d, <sup>2</sup>J<sub>H,H</sub> = 16.2 Hz, 2H, **H-8a**, **H-16a**), 4.23 (s, 2H, -N-CH<sub>2</sub>-N-), 4.54 (d, <sup>2</sup>J<sub>H,H</sub> = 16.5 Hz, 2H, **H-8b**, **H-16b**), 5.12 (d, <sup>3</sup>J<sub>H,H</sub> = 8.4 Hz, 2H, 2 × -O-CO-NH), 6.65 (s, 2H, **H-6**, **H-14**), 7.66 (s, 2H, **H-3**, **H-11**), 7.72 (s, 2H, 2 × CO-NH).

**<sup>13</sup>C-NMR:** (75 MHz, CDCl<sub>3</sub>) δ [ppm] 17.3 (2 × -CH<sub>3</sub>), 18.1 (2 × -CH-CH<sub>3</sub>), 19.6 (2 × -CH-CH<sub>3</sub>), 28.5 (2 × -C(CH<sub>3</sub>)<sub>3</sub>), 30.3 (2 × -CH(CH<sub>3</sub>)<sub>2</sub>), 58.4 (**C-8**, **C-16**), 61.1 (2 × -CH-NH-), 67.1 (-N-CH<sub>2</sub>-N-), 80.5 (2 × -C(CH<sub>3</sub>)<sub>3</sub>), 119.0 (**C-3**, **C-11**), 124.6 (**C-7**, **C-15**), 124.9 (**C-5**, **C-13**), 128.7 (**C-6**, **C-14**), 134.6 (**C-4**, **C-12**), 146.3 (**C-2**, **C-10**), 156.3 (2 × NH-CO-O), 170.1 (2 × NH-CO).

**HR-MS:** (ESI positive, CH<sub>3</sub>OH) calc. for [C<sub>37</sub>H<sub>55</sub>N<sub>6</sub>O<sub>6</sub>]<sup>+</sup>: [M+H]<sup>+</sup> 679.41776, found 679.41805, calc. for [C<sub>37</sub>H<sub>54</sub>N<sub>6</sub>O<sub>6</sub>Na]<sup>+</sup>: [M+Na]<sup>+</sup> 701.39970, found 701.40023.

**UV:** (CH<sub>2</sub>Cl<sub>2</sub>) λ (lgε) = 229 nm (4.330), 299 (3.480).

**IR:** (KBr) ν<sub>max</sub> = 3435 cm<sup>-1</sup>, 2969, 2931, 1688, 1623, 1518, 1498, 1367, 1170, 920.

**Optical rotation:** [α]<sub>D</sub><sup>21</sup> (deg cm<sup>3</sup> g<sup>-1</sup> dm<sup>-1</sup>) = +83.6 (c = 1.0, CHCl<sub>3</sub>)

**Melting point:** 255-256 °C

**diastereomer 2:**

**R<sub>f</sub>:** 0.30 (chloroform/methanol = 50:1 v/v)

**<sup>1</sup>H-NMR:** (400 MHz, CDCl<sub>3</sub>) δ [ppm] 0.98 (d, <sup>3</sup>J<sub>H,H</sub> = 6.4 Hz, 6H, 2 × -CH-CH<sub>3</sub>), 1.03 (d, <sup>3</sup>J<sub>H,H</sub> = 6.4 Hz, 6H, 2 × -CH-CH<sub>3</sub>), 1.45 (s, 18H, 2 × -C(CH<sub>3</sub>)<sub>3</sub>), 2.10 (s, 6H, 2 × CH<sub>3</sub>), 2.27-2.32 (m, 2H, 2 × -CH(CH<sub>3</sub>)<sub>2</sub>), 3.98 (dd, <sup>3</sup>J<sub>H,H</sub> = 8.0, 6.6 Hz, 2H, 2 × -CH-NH-), 4.13 (d, <sup>2</sup>J<sub>H,H</sub> = 16.4 Hz, 2H, **H-8a**, **H-16a**), 4.24 (s, 2H, -N-CH<sub>2</sub>-N-), 4.55 (d, <sup>2</sup>J<sub>H,H</sub> = 16.8 Hz, 2H, **H-8b**, **H-16b**), 5.09 (br, 2H, 2 × -O-CO-NH), 6.68 (s, 2H, **H-6**, **H-14**), 7.66 (s, 2H, **H-3**, **H-11**), 7.67 (s, 2H, 2 × CO-NH).

**<sup>13</sup>C-NMR:** (100 MHz, CDCl<sub>3</sub>) δ [ppm] 17.3 (2 × -CH<sub>3</sub>), 18.0 (2 × -CH-CH<sub>3</sub>), 19.7 (2 × -CH-CH<sub>3</sub>), 28.4 (2 × -C(CH<sub>3</sub>)<sub>3</sub>), 30.2 (-CH(CH<sub>3</sub>)<sub>2</sub>), 58.4 (**C-8**, **C-16**), 61.1 (2 × -CH-NH-), 67.1 (-N-CH<sub>2</sub>-N-), 80.5 (2 × -C(CH<sub>3</sub>)<sub>3</sub>), 119.0 (**C-3**, **C-11**), 124.5 (**C-7**, **C-15**), 125.0 (**C-5**, **C-13**), 128.7 (**C-6**, **C-14**), 134.5 (**C-4**, **C-12**), 146.3 (**C-2**, **C-10**), 156.3 (2 × NH-CO-O), 169.9 (2 × NH-CO).

**HR-MS:** (ESI positive, CH<sub>3</sub>OH) calc. for [C<sub>37</sub>H<sub>55</sub>N<sub>6</sub>O<sub>6</sub>]<sup>+</sup>: [M+H]<sup>+</sup> 679.41776, found 679.41805, calc. for [C<sub>37</sub>H<sub>54</sub>N<sub>6</sub>O<sub>6</sub>Na]<sup>+</sup>: [M+Na]<sup>+</sup> 701.39970, found 701.40023.

**UV:** (CH<sub>2</sub>Cl<sub>2</sub>) λ (lgε) = 231 nm (4.998), 298 (4.191).

**IR:** (KBr) ν<sub>max</sub> = 3429 cm<sup>-1</sup>, 2969, 2931, 1689, 1497, 1367, 1170, 921.

**Optical rotation:**  $[\alpha]_D^{22}(\text{deg cm}^3 \text{ g}^{-1} \text{ dm}^{-1}) = -151.7$  (c = 1.0, CHCl<sub>3</sub>)

**Melting point:** 182-184 °C

### 3,9-diazido-2,8-dimethyl-6*H*,12*H*-5,11-methanodibenzo[*b,f*][1,5]diazocine

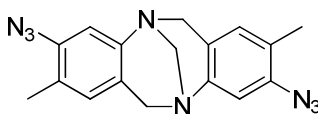

9

#### Method A:

To an ice-cooled suspension of Hünlich's base (6.00 g, 21.4 mmol, 1 eq.) in water (15.0 ml) was subsequently added concentrated sulfuric acid (4.20 ml, 7.68 g, 78.6 mmol, 3.67 eq.), NaNO<sub>3</sub> (1.62 g, 19.1 mmol, 0.9 eq.) in water (9.60 ml), NaN<sub>3</sub> (1.42 g, 21.8 mmol, 1.02 eq.) in water (15.0 ml) and dichloromethane (36 ml). Then, the mixture was stirred one hour at 0 °C and one hour at rt. After separation of the phases, the aqueous one was extracted twice with dichloromethane (120 ml). The combined organic layers were dried over Na<sub>2</sub>SO<sub>4</sub> and after solvent removal the product was purified by recrystallization from dichloromethane to furnish the desired compound (2.40 g, 7.20 mmol, 34 %) as yellow solid.

#### Method B:

To a solution of Hünlich's base (50.0 mg, 0.178 mmol, 1.0 eq.), potassium carbonate (83.8 mg, 0.606 mmol, 3.4 eq.) and copper sulfate (0.28 μg, 1.78 μmol, 0.01 eq.) in methanol (900 μl) was added freshly prepared 1*H*-imidazole-1-sulfonyl azide hydrochloride (89.7 mg, 0.428 mmol, 2.4 eq.) and the resulting mixture was stirred at rt for 18 h. After addition of water (1.0 ml) and slight acidification with hydrochloric acid the mixture was extracted with ethyl acetate (3 × 3 ml). The combined organic layers were dried over MgSO<sub>4</sub> and after solvent removal the product was purified by column chromatography to furnish the desired compound (33.2 mg, 0.100 mmol, 56 %) as faintly yellow solid.

R<sub>f</sub>: 0.24 (*n*-hexane/ethyl acetate = 5:1 *v/v*)

**<sup>1</sup>H-NMR:** (300 MHz, CDCl<sub>3</sub>) δ [ppm] 2.07 (s, 6H, 2 × -CH<sub>3</sub>), 4.11 (d, <sup>2</sup>*J*<sub>H,H</sub> = 16.5 Hz, 2H, **H-6a**, **H-12a**), 4.28 (s, 2H, -N-CH<sub>2</sub>-N-), 4.63 (d, <sup>2</sup>*J*<sub>H,H</sub> = 16.5 Hz, 2H, **H-6b**, **H-12b**), 6.70 (s, 2H, **H-1**, **H-7**), 6.87 (s, 2H, **H-4**, **H-10**).

**<sup>13</sup>C-NMR:** (75 MHz, CDCl<sub>3</sub>) δ [ppm] 16.8 (2 × -CH<sub>3</sub>), 58.5 (**C-6**, **C-12**), 67.0 (**C-13**), 114.2 (**C-4**, **C-10**), 124.0 (**C-6a**, **C-12a**), 125.9 (**C-2**, **C-8**), 129.4 (**C-1**, **C-7**), 137.7 (**C-3**, **C-9**), 146.8 (**C-4a**, **C-10a**).

**HR-MS:** (ESI positive, CH<sub>3</sub>OH) calc. for [C<sub>17</sub>H<sub>17</sub>N<sub>8</sub>]<sup>+</sup>: [M+H]<sup>+</sup> 333.15707, found 333.15677.

**UV:** (CHCl<sub>3</sub>) λ (lgε) = 249 nm (4.487), 309 (3.984).

**IR:** (KBr) ν<sub>max</sub> = 2951 cm<sup>-1</sup>, 2902, 2108, 1616, 1572, 1490, 1306, 1290, 1080, 1030, 920.

**Melting point:** 182-185 °C



**3,9-diiodo-2,8-dimethyl-6H,12H-5,11-methanodibenzo[*b,f*][1,5]diazocine**

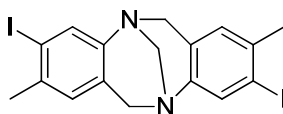

**10**

To an ice-cooled suspension of Hünlich's base (6.00 g, 21.4 mmol, 1 eq.) in water (15.0 ml) was subsequently added concentrated sulfuric acid (4.20 ml, 7.68 g, 78.6 mmol, 3.67 eq.), NaNO<sub>3</sub> (1.62 g, 19.1 mmol, 0.9 eq.) in water (9.60 ml), NaI (3.27 g, 21.8 mmol, 1.02 eq.) in water (15.0 ml) and dichloromethane (36.0 ml). Then, the mixture was stirred one hour at 0 °C and one hour at rt. After separation of the phases, the aqueous one was extracted twice with dichloromethane (120 ml). The combined organic layers were dried over Na<sub>2</sub>SO<sub>4</sub> and after solvent removal the product was purified by column chromatography on silica to furnish the desired compound (5.16 g, 10.3 mmol, 48 %) as brownish solid.

**R<sub>f</sub>**: 0.32 (*n*-hexane/ethyl acetate = 5:1 *v/v*)

**<sup>1</sup>H-NMR**: (400 MHz, CDCl<sub>3</sub>) δ [ppm] 2.29 (s, 6H, 2 × -CH<sub>3</sub>), 4.05 (d, <sup>2</sup>*J*<sub>H,H</sub> = 17.0 Hz, 2H, **H-6a**, **H-12a**), 4.21 (s, 2H, -N-CH<sub>2</sub>-N-), 4.55 (d, <sup>2</sup>*J*<sub>H,H</sub> = 17.0 Hz, 2H, **H-6b**, **H-12b**), 6.77 (s, 2H, **H-1**, **H-7**), 7.58 (s, 2H, **H-4**, **H-10**).

**<sup>13</sup>C-NMR**: (100 MHz, CDCl<sub>3</sub>) δ [ppm] 27.4 (2 × -CH<sub>3</sub>), 58.6 (**C-6**, **C-12**), 66.9 (**C-13**), 98.7 (**C-3**, **C-9**), 127.74 (**C-4**, **C-10**), 127.77 (**C-6a**, **C-12a**), 135.2 (**C-1**, **C-7**), 137.1 (**C-2**, **C-8**), 146.9 (**C-4a**, **C-10a**).

**HR-MS**: (ESI positive, CH<sub>3</sub>OH) calc. for [C<sub>17</sub>H<sub>17</sub>I<sub>2</sub>N<sub>2</sub>]<sup>+</sup>: [M+H]<sup>+</sup> 502.94756, found 502.94722.

**UV**: (CHCl<sub>3</sub>) λ (lgε) = 241 nm (4.319), 298 (3.665).

**IR**: (KBr) ν<sub>max</sub> = 3436 cm<sup>-1</sup>, 2941, 2911, 1599, 1471, 1434, 1200, 1066, 955, 875.

**Melting point**: 205-210 °C

**3-azido-2,8-dimethyl-9-(4-phenyl-1*H*-1,2,3-triazol-1-yl)-6*H*,12*H*-5,11-methanodibenzo[*b,f*][1,5]diazocine**

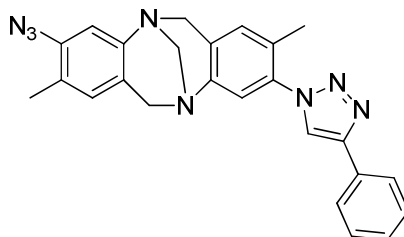

**11**

Triethylamine (51.5  $\mu$ l, 38.9 mg, 0.301 mmol, 2.0 eq.) and phenylacetylene (33.0  $\mu$ l, 30.7 mg, 0.301 mmol, 2.0 eq.) was subsequently added to a suspension of 3,9-diazido-2,8-dimethyl-6*H*,12*H*-5,11-methanodibenzo[*b,f*][1,5]diazocine (50.0 mg, 0.150 mmol, 1.0 eq.) and cuprous iodide (28.6 mg, 0.150 mmol, 1.0 eq.) in dichloromethane (2.5 ml). After stirring at rt for 24 h water (12.5 ml) was added. Then, the reaction mixture was extracted with 2-methoxy-2-methylpropane (3  $\times$  10 ml) before the combined organic layers were dried over Na<sub>2</sub>SO<sub>4</sub> and all volatiles were removed under reduced pressure. Column chromatography furnished the titled compound (26.1 mg, 0.0600 mmol, 40 %) as brown solid.

**R<sub>f</sub>**: 0.24 (*n*-hexane/ethyl acetate = 2:1 *v/v*)

**<sup>1</sup>H-NMR**: (300 MHz, CDCl<sub>3</sub>)  $\delta$  [ppm] 2.09 (s, 3H, C-2-CH<sub>3</sub>), 2.14 (s, 3H, C-8-CH<sub>3</sub>), 4.12 (d, <sup>2</sup>*J*<sub>H,H</sub> = 16.8 Hz, 1H, **H-12a**), 4.23 (d, <sup>2</sup>*J*<sub>H,H</sub> = 16.8 Hz, 1H, **H-6a**), 4.31 (s, 2H, -N-CH<sub>2</sub>-N-), 4.63 (d, <sup>2</sup>*J*<sub>H,H</sub> = 17.1 Hz, 1H, **H-12b**), 4.71 (d, <sup>2</sup>*J*<sub>H,H</sub> = 16.8 Hz, 1H, **H-6b**), 6.71 (s, 1H, **H-1**), 6.89 (s, 1H, **H-4**), 6.94 (s, 1H, **H-7**), 7.18 (s, 1H, **H-10**), 7.33-7.39 (m, 1H, **H<sub>Ph</sub>-4**), 7.44-7.48 (m, 2H, **H<sub>Ph</sub>-3**, **H<sub>Ph</sub>-3'**), 7.88-7.91 (m, 3H, **H<sub>triazole</sub>-5**, **H<sub>Ph</sub>-2**, **H<sub>Ph</sub>-2'**).

**<sup>13</sup>C-NMR**: (75 MHz, CDCl<sub>3</sub>)  $\delta$  [ppm] 16.8 (C-2-CH<sub>3</sub>), 17.5 (C-8-CH<sub>3</sub>), 58.6 (**C-12**), 58.7 (**C-6**), 67.0 (-N-CH<sub>2</sub>-N-), 114.2 (**C-4**), 121.2 (**C<sub>triazole</sub>-5**), 122.5 (**C-10**), 123.8 (**C-12a**), 126.0 (**C<sub>Ph</sub>-2**, **C<sub>Ph</sub>-2'**), 126.1 (**C-2**), 128.5 (**C<sub>Ph</sub>-4**), 129.1 (**C<sub>Ph</sub>-3**, **C<sub>Ph</sub>-3'**), 129.2 (**C-6a**), 129.5 (**C-1**), 129.8 (**C-8**), 130.5 (**C-7**), 135.7 (**C-9**), 137.9 (**C-3**), 146.8 (**C-4a**), 147.0 (**C-10a**), 147.8 (**C<sub>triazole</sub>-4**).

**HR-MS**: (ESI positive, CDCl<sub>3</sub>/CH<sub>3</sub>OH) calc. for [C<sub>25</sub>H<sub>22</sub>N<sub>8</sub>Na]<sup>+</sup>: [M+Na]<sup>+</sup> 457.18596, found 457.18616.

**UV**: (CHCl<sub>3</sub>)  $\lambda$  (lg $\epsilon$ ) = 253 nm (4.545), 256 (4.541).

**IR**: (KBr)  $\nu_{\max}$  = 2924 cm<sup>-1</sup>, 2852, 2116, 1617, 1575, 1491, 1385, 1304, 1294, 1081, 1034, 766.

**Melting point**: 197-202 °C

**3-azido-9-(4-hexyl-1H-1,2,3-triazol-1-yl)-2,8-dimethyl-6H,12H-5,11-methanodibenzo[*b,f*][1,5]diazocine**

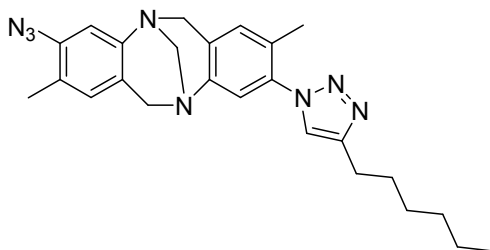

**12**

Hünig's base (22.5  $\mu$ l, 17.0 mg, 0.131 mmol, 2.0 eq.), acetic acid (7.50  $\mu$ l, 7.88 mg, 0.131 mmol, 2.0 eq.), and 1-octyne (58.1  $\mu$ l, 43.4 mg, 0.394 mmol, 6.0 eq.) was subsequently added to a suspension of 3,9-diazido-2,8-dimethyl-6H,12H-5,11-methanodibenzo[*b,f*][1,5]diazocine (21.8 mg, 0.0656 mmol, 1.0 eq.) and cuprous iodide (12.5 mg, 0.0656 mmol, 1.0 eq.) in dichloromethane (1.25 ml). After stirring at rt for 24 h water (6.0 ml) was added. Then, the reaction mixture was extracted with ethyl acetate (3  $\times$  5 ml) before the combined organic layers were dried over Na<sub>2</sub>SO<sub>4</sub> and all volatiles were removed under reduced pressure. Column chromatography furnished the titled compound (11.6 mg, 0.0262 mmol, 40 %) as brown solid.

**R<sub>f</sub>**: 0.20 (*n*-hexane/ethyl acetate = 1:1 v/v)

**<sup>1</sup>H-NMR**: (300 MHz, CDCl<sub>3</sub>)  $\delta$  [ppm] 0.87-0.91 (m, 3H, -CH<sub>3</sub>), 1.31-1.43 (m, 6H, H<sub>Hex</sub>-3, H<sub>Hex</sub>-3', H<sub>Hex</sub>-4, H<sub>Hex</sub>-4', H<sub>Hex</sub>-5, H<sub>Hex</sub>-5'), 1.67-1.75 (m, 2H, H<sub>Hex</sub>-2, H<sub>Hex</sub>-2'), 2.07 (s, 3H, C-8-CH<sub>3</sub>), 2.08 (s, 3H, C-2-CH<sub>3</sub>), 2.79 (t, <sup>3</sup>J<sub>H,H</sub> = 7.7 Hz, 2H, H<sub>Hex</sub>-1, H<sub>Hex</sub>-1'), 4.11 (d, <sup>2</sup>J<sub>H,H</sub> = 16.8 Hz, 1H, H-12a), 4.21 (d, <sup>2</sup>J<sub>H,H</sub> = 17.1 Hz, 1H, H-6a), 4.30 (s, 2H, -N-CH<sub>2</sub>-N-), 4.61 (d, <sup>2</sup>J<sub>H,H</sub> = 16.5 Hz, 1H, H-12b), 4.70 (d, <sup>2</sup>J<sub>H,H</sub> = 17.4 Hz, 1H, H-6b), 6.69 (s, 1H, H-1), 6.89 (s, 1H, H-4), 6.90 (s, 1H, H-7), 7.12 (s, 1H, H-10), 7.41 (s, 1H, H<sub>triazole</sub>-5).

**<sup>13</sup>C-NMR**: (75 MHz, CDCl<sub>3</sub>)  $\delta$  [ppm] 14.2 (-CH<sub>3</sub>), 16.8 (C-2-CH<sub>3</sub>), 17.4 (C-8-CH<sub>3</sub>), 22.7 (C<sub>Hex</sub>-5), 25.7 (C<sub>Hex</sub>-1), 29.1 (C<sub>Hex</sub>-3), 29.5 (C<sub>Hex</sub>-2), 31.7 (C<sub>Hex</sub>-4), 58.5 (C-12), 58.6 (C-6), 67.0 (-N-CH<sub>2</sub>-N-), 114.1 (C-4), 122.3 (C<sub>triazole</sub>-5), 122.5 (C-10), 123.8 (C-12a), 126.1 (C-2), 129.2 (C-8), 129.3 (C-6a), 129.5 (C-1), 129.7 (C-7), 136.0 (C-9), 137.8 (C-3), 146.6 (C-4a), 146.7 (C-10a), 148.4 (C<sub>triazole</sub>-4).

**HR-MS**: (ESI positive, CHCl<sub>3</sub>/CH<sub>3</sub>OH) calc. for [C<sub>25</sub>H<sub>31</sub>N<sub>8</sub>]<sup>+</sup>: [M+H]<sup>+</sup> 443.26662, found 443.26640, calc. for [C<sub>25</sub>H<sub>30</sub>N<sub>8</sub>Na]<sup>+</sup>: [M+Na]<sup>+</sup> 465.24856, found 465.24833.

**UV**: (CH<sub>2</sub>Cl<sub>2</sub>)  $\lambda$  (lg $\epsilon$ ) = 231 nm (4.238), 302 (3.543).

**IR**: (KBr)  $\nu_{\text{max}}$  = 2952 cm<sup>-1</sup>, 2854, 2115, 1711, 1619, 1572, 1503, 1492, 1455, 1302, 1039, 916.

**Melting point**: 88-90 °C

Proposed structures for the synthesized base by Walter Hünlich:

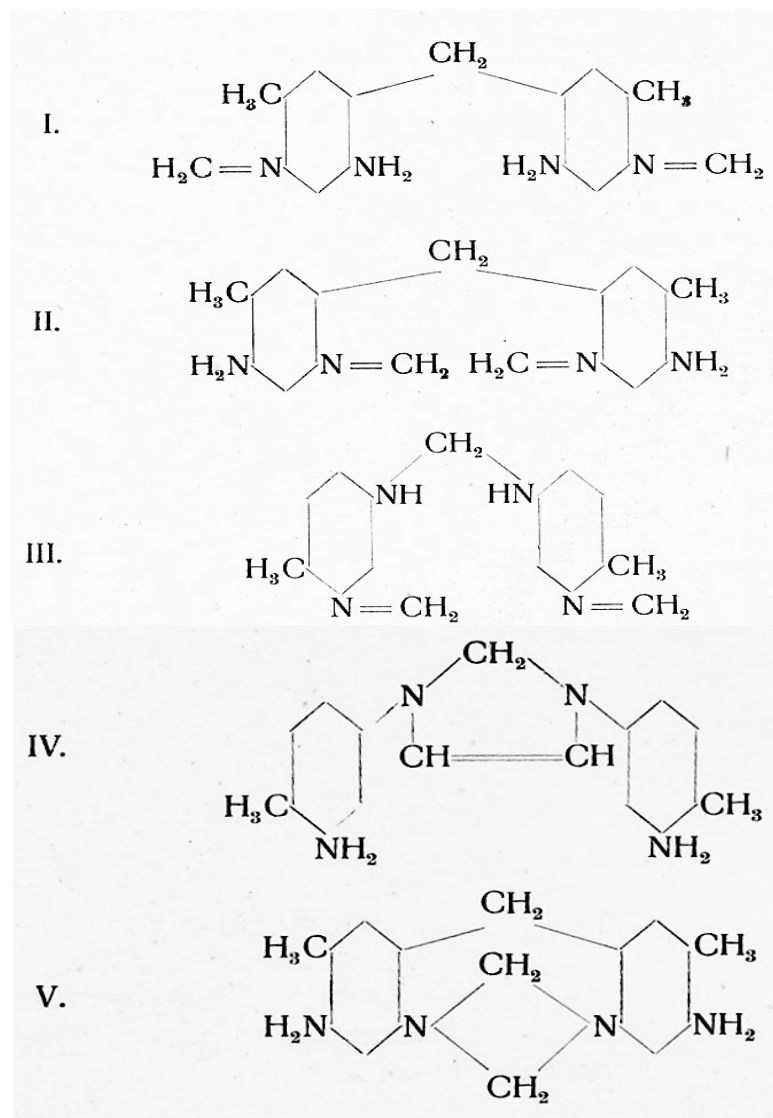

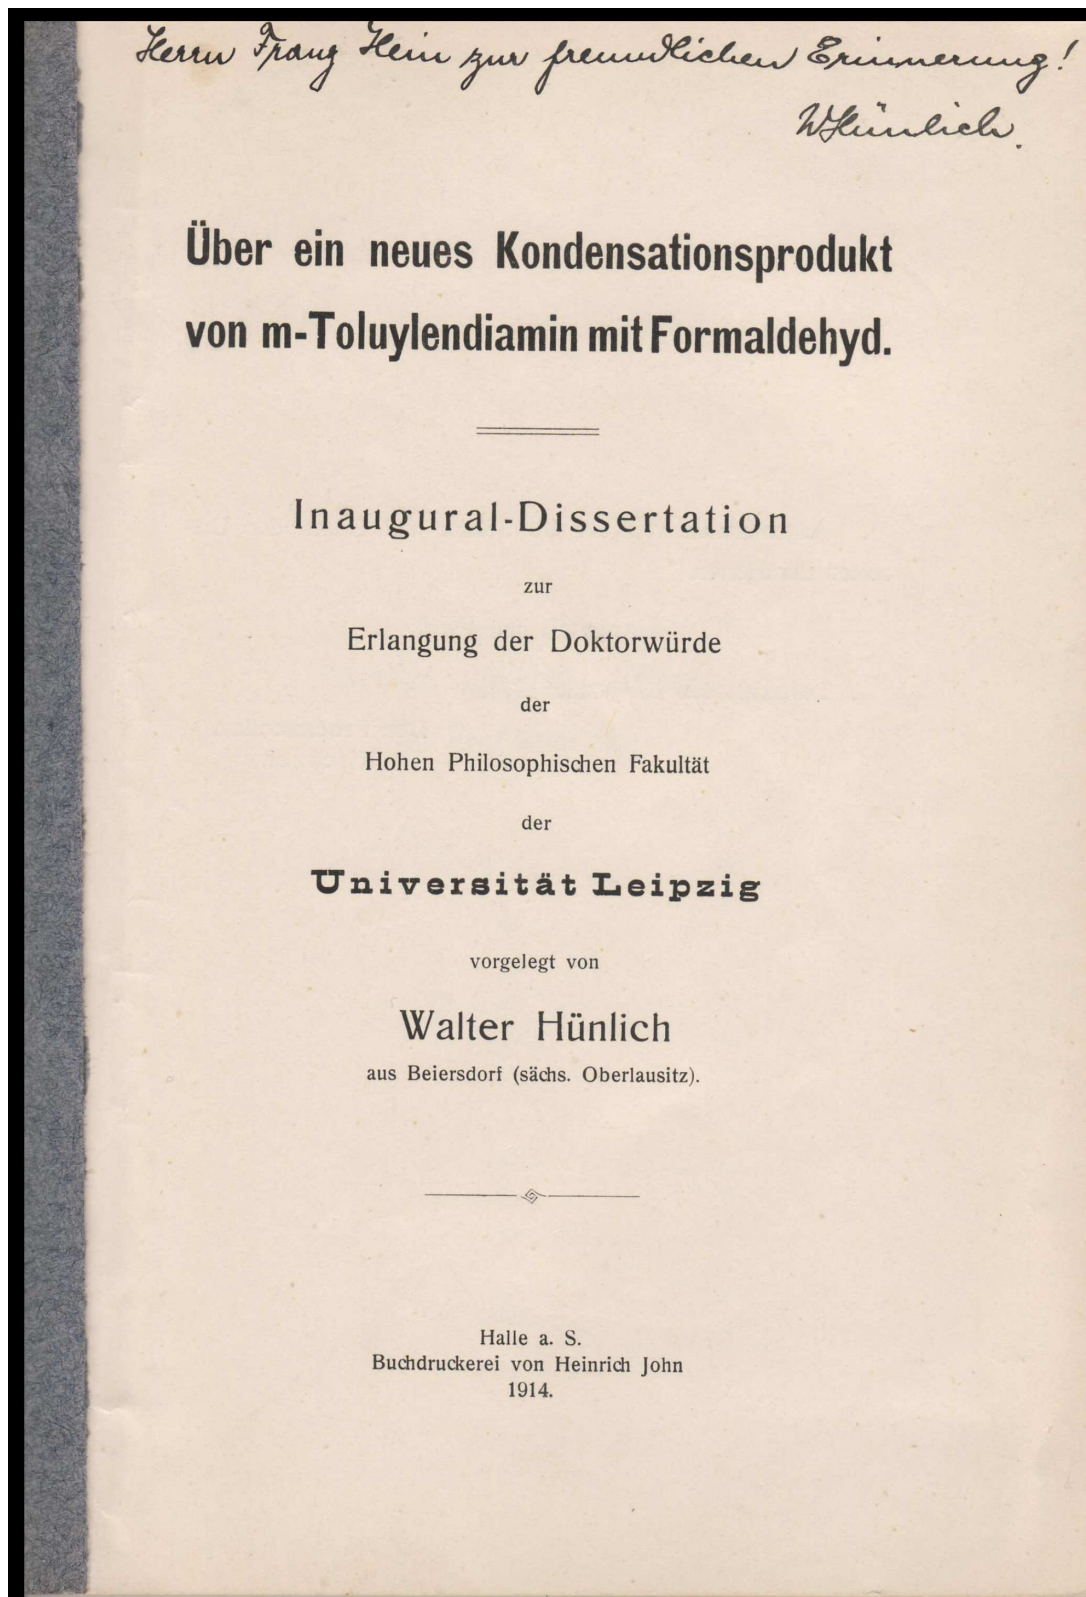

German handwritten text at the top: „Herrn Franz Hein zur freundlichen Erinnerung! WHünlich.“

K. Richter

Sample: Kari 5-21

Pulse Sequence: s2pul  
Date: Jan 17 2012

Solvent: cdcl3  
Temp. 26.0 C / 299.1 K  
Operator: walkup  
Mercury-400BB "felix"

Relax. delay 1.000 sec  
Pulse 29.7 degrees  
Acq. time 1.996 sec  
Width 6398.0 Hz

32 repetitions  
OBSERVE H1, 399.9975364 MHz  
DATA PROCESSING  
Line broadening 0.2 Hz  
FT size 32768  
Total time 1 min, 50 sec

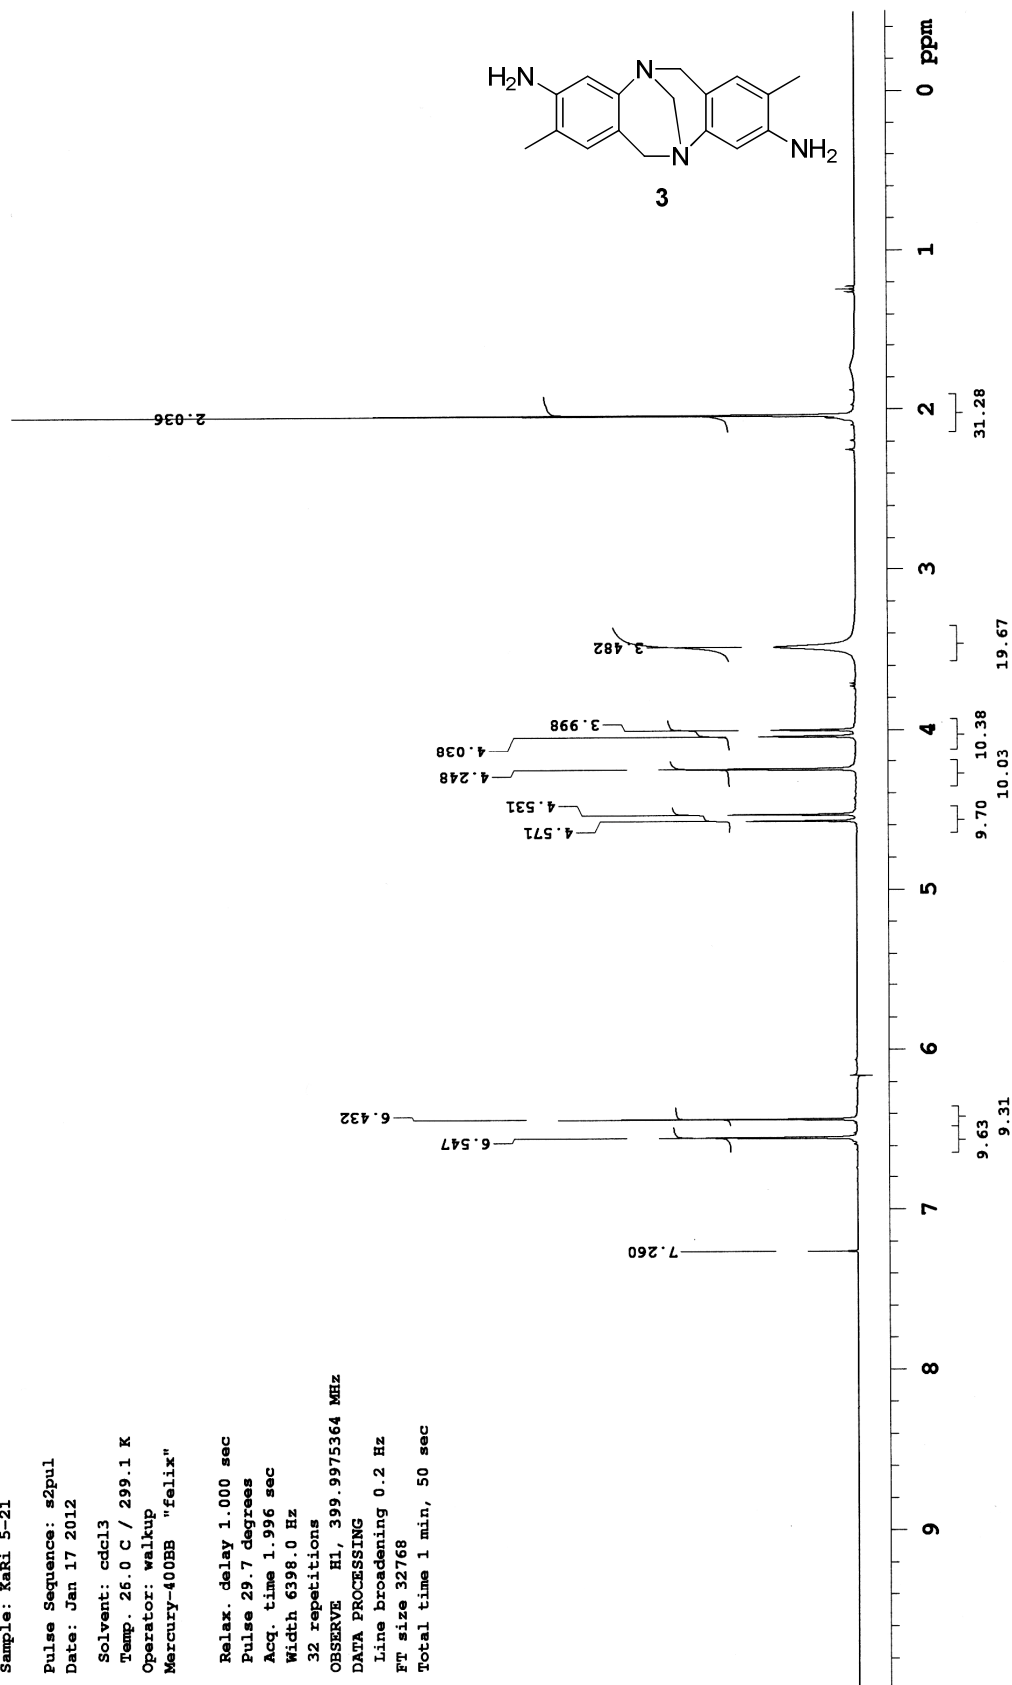

K. Richter

Sample: KaRi 5-21

Pulse Sequence: s2pul

Date: Jan 17 2012

Solvent: cdcl3

Temp. 26.0 C / 299.1 K

Operator: walkup

Mercury-400BB "felix"

Relax. delay 1.000 sec

Pulse 45.0 degrees

Acq. time 1.300 sec

Width 24154.6 Hz

128 repetitions

OBSERVE C13, 100.5794365 MHz

DECOUPLE H1, 399.9994929 MHz

Power 38 dB

continuously on

WALTZ-16 modulated

DATA PROCESSING

Line broadening 1.0 Hz

FT size 65536

Total time 40 min, 57 sec

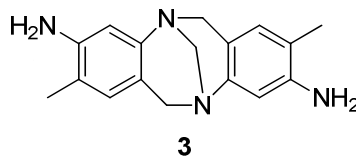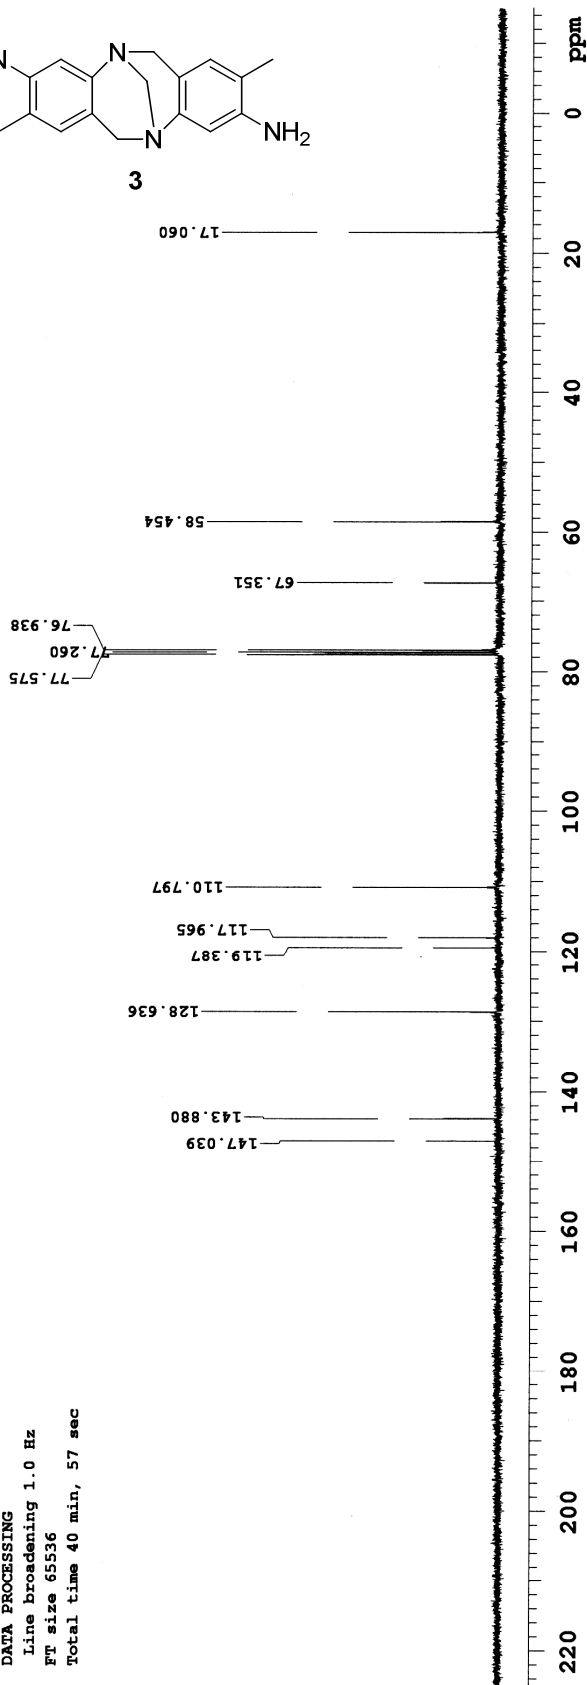

Sample: StR-HPf3  
FID directory: /home/vnmr1/service/STRHDF3H.fid  
Pulse Sequence: s2pul

Solvent: cdcl3  
Temp. 26.0 C / 299.1 K  
Operator: vnmr1  
File: STRHDF3H  
Mercury-300BB "jutta"

Relax. delay 1.000 sec  
Pulse 30.5 degrees  
Acq. time 1.998 sec  
Width 4800.8 Hz  
24 repetitions

OBSERVE H1, 300.0816984 MHz  
 DATA PROCESSING  
 Line broadening 0.2 Hz  
 FFT size 32768  
 Total time 3 min, 35 sec  
 7.552  
 7.442

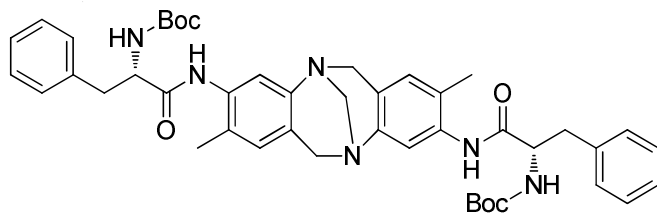

**7, diastereomer 1**

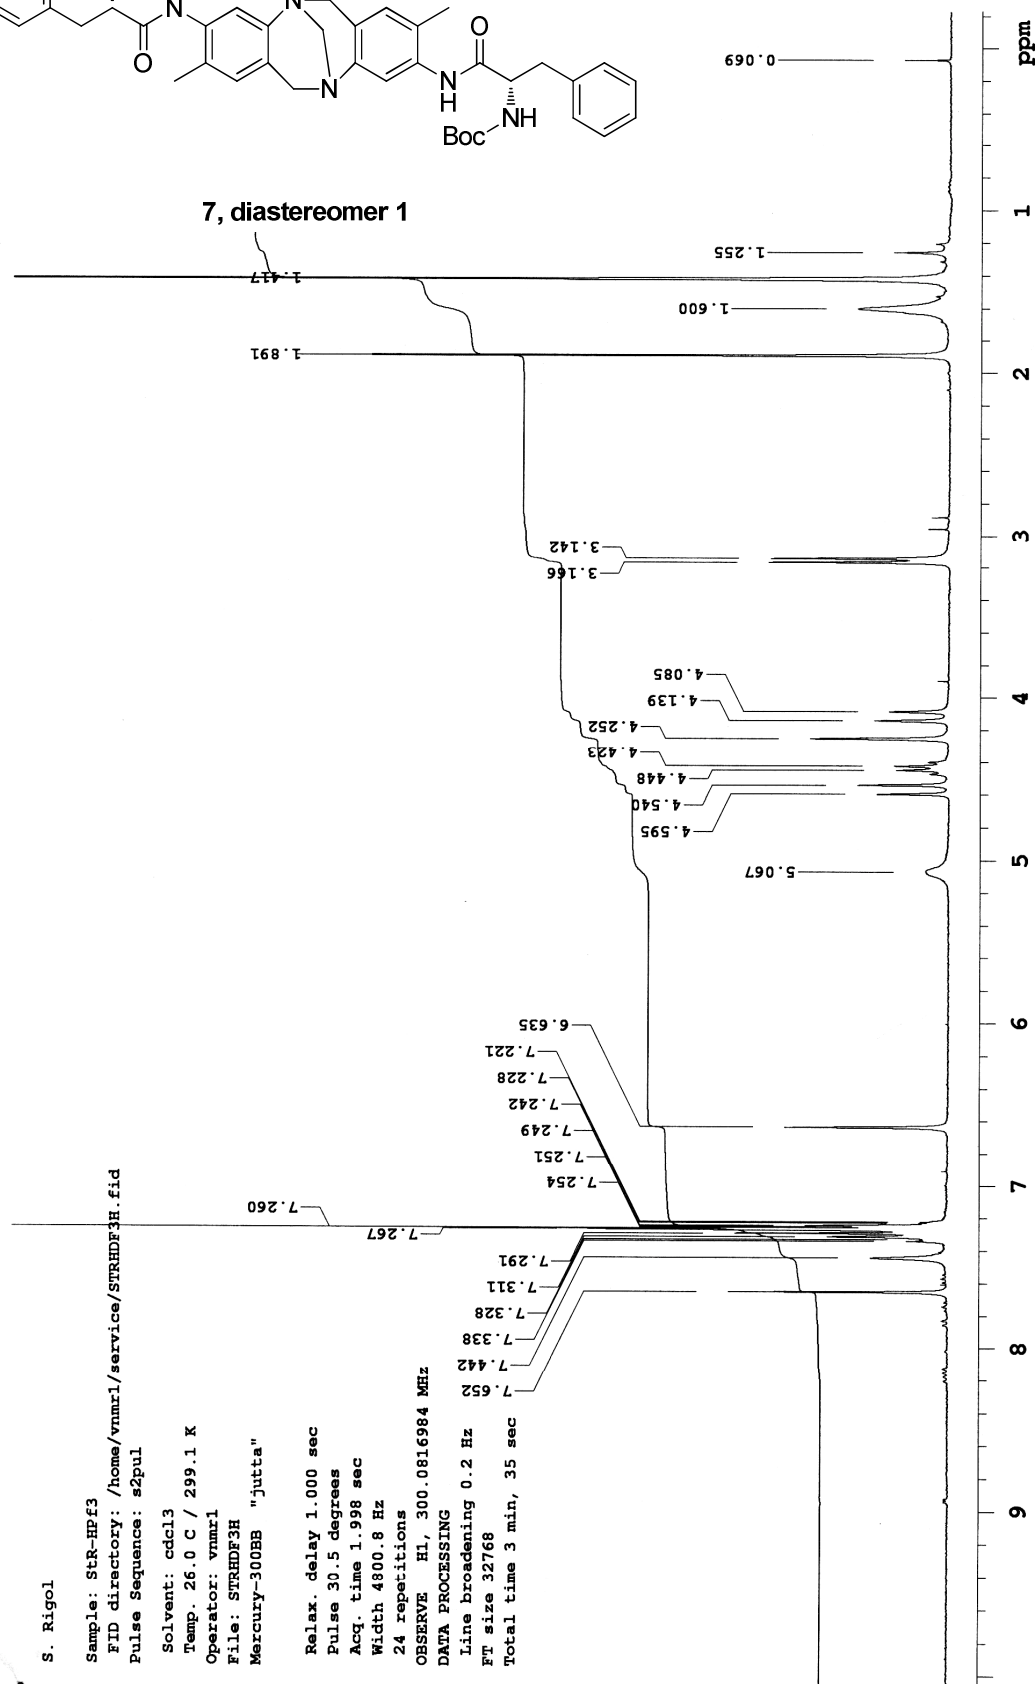



Std Carbon experiment

Sample: Str-Hpf3

Pulse Sequence: s2pul

Solvent: cdcl3

Temp. 26.0 C / 299.1 K

Operator: vnmr1

Mercury-300BB "jutta"

Relax. delay 1.000 sec

Pulse 45.0 degrees

Acq. time 1.301 sec

Width 18115.9 Hz

2000 repetitions

OBSERVE C13, 75.4555905 MHz

DECOUPLE H1, 300.0831467 MHz

Power 37 dB

continuously on

WALTZ-16 modulated

DATA PROCESSING

Line broadening 1.0 Hz

FT size 65536

Total time 1 hr, 20 min, 53 sec

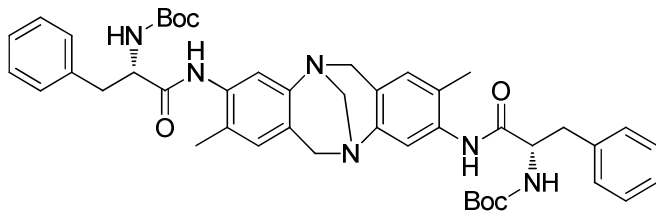

7, diastereomer 1

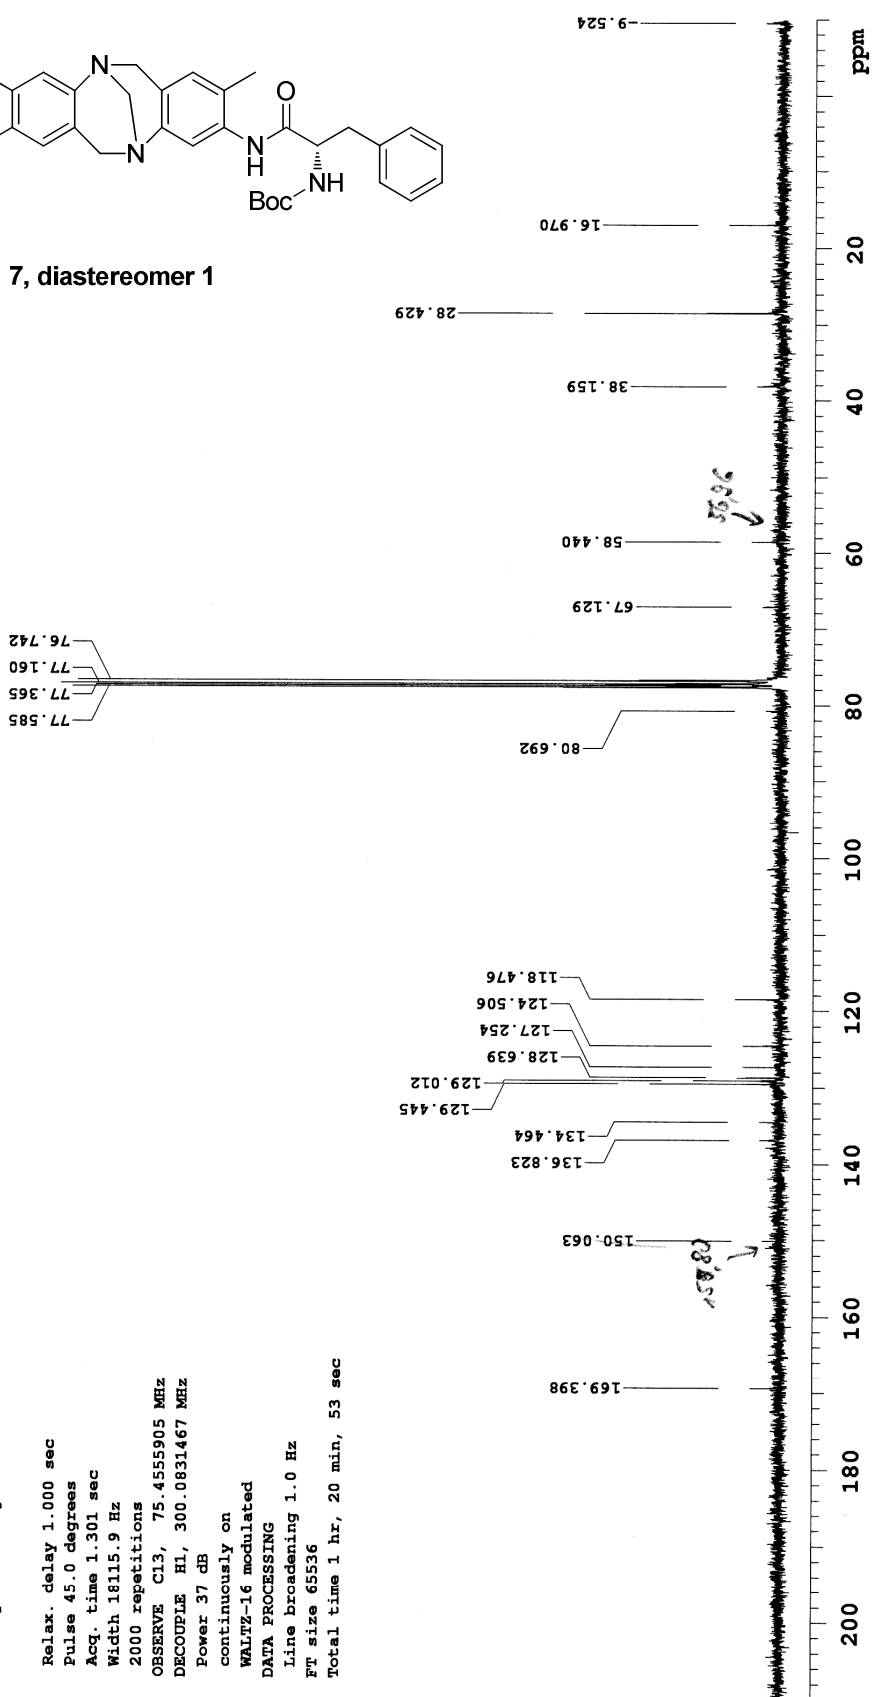

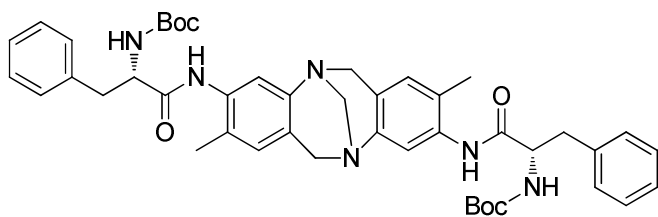

7, diastereomer 2

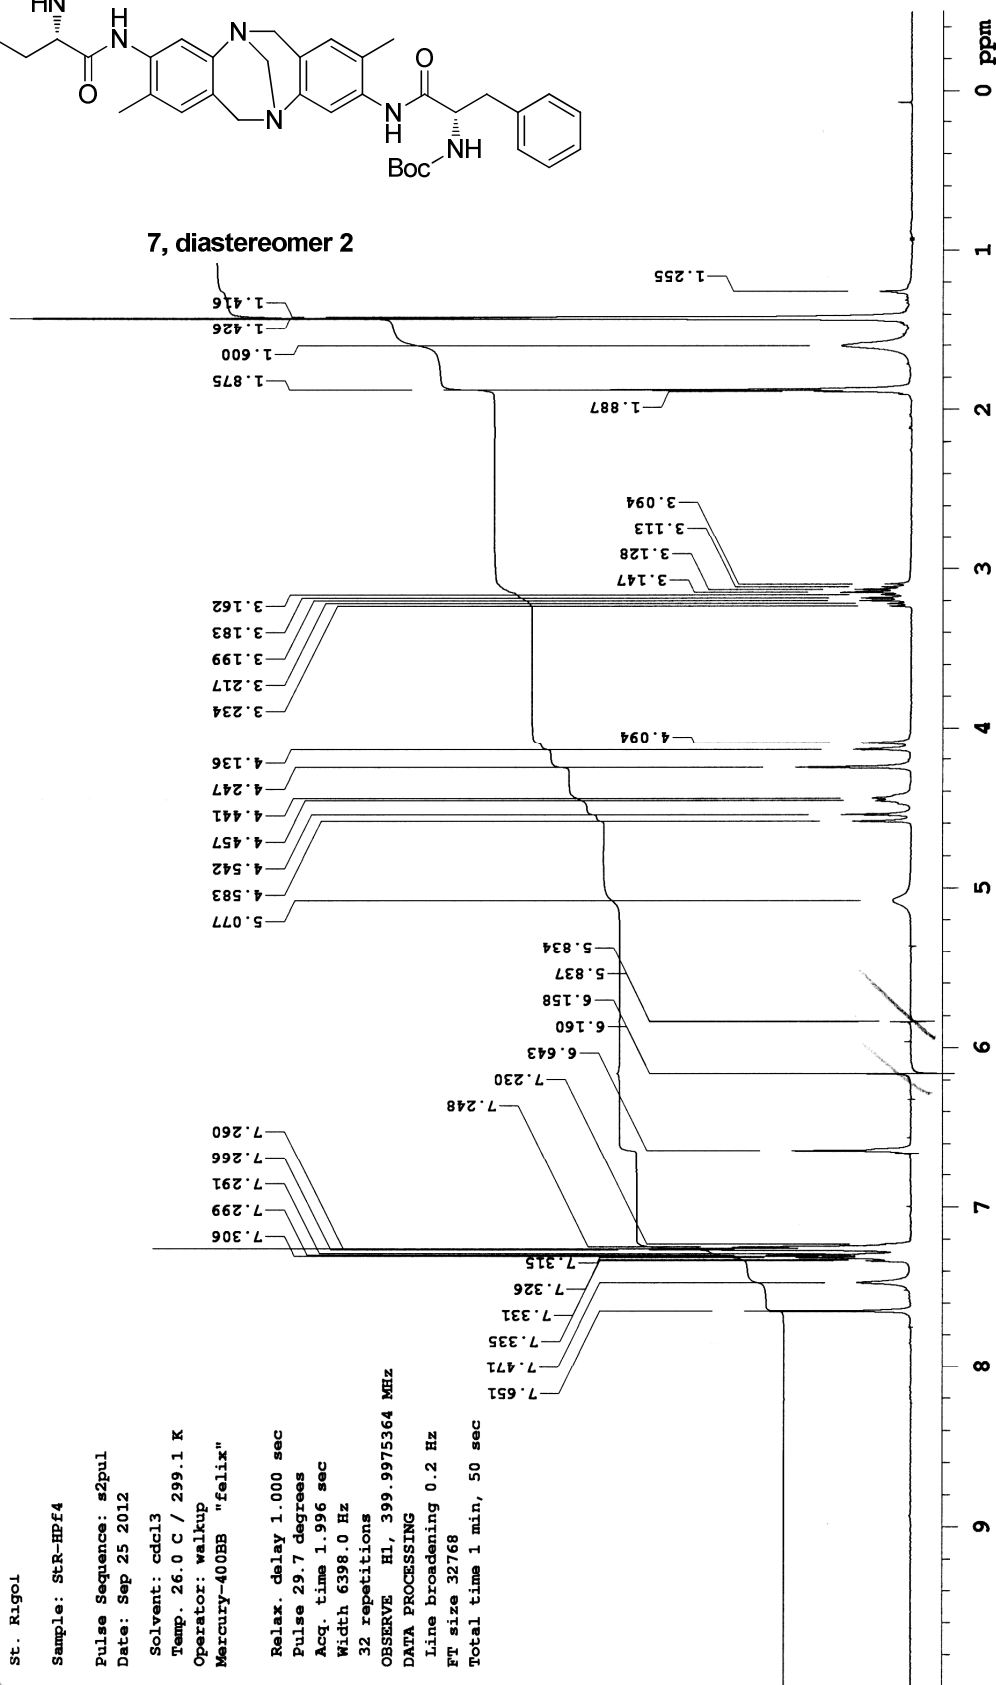

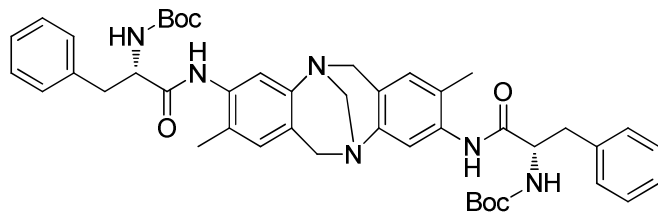

7, diastereomer 2

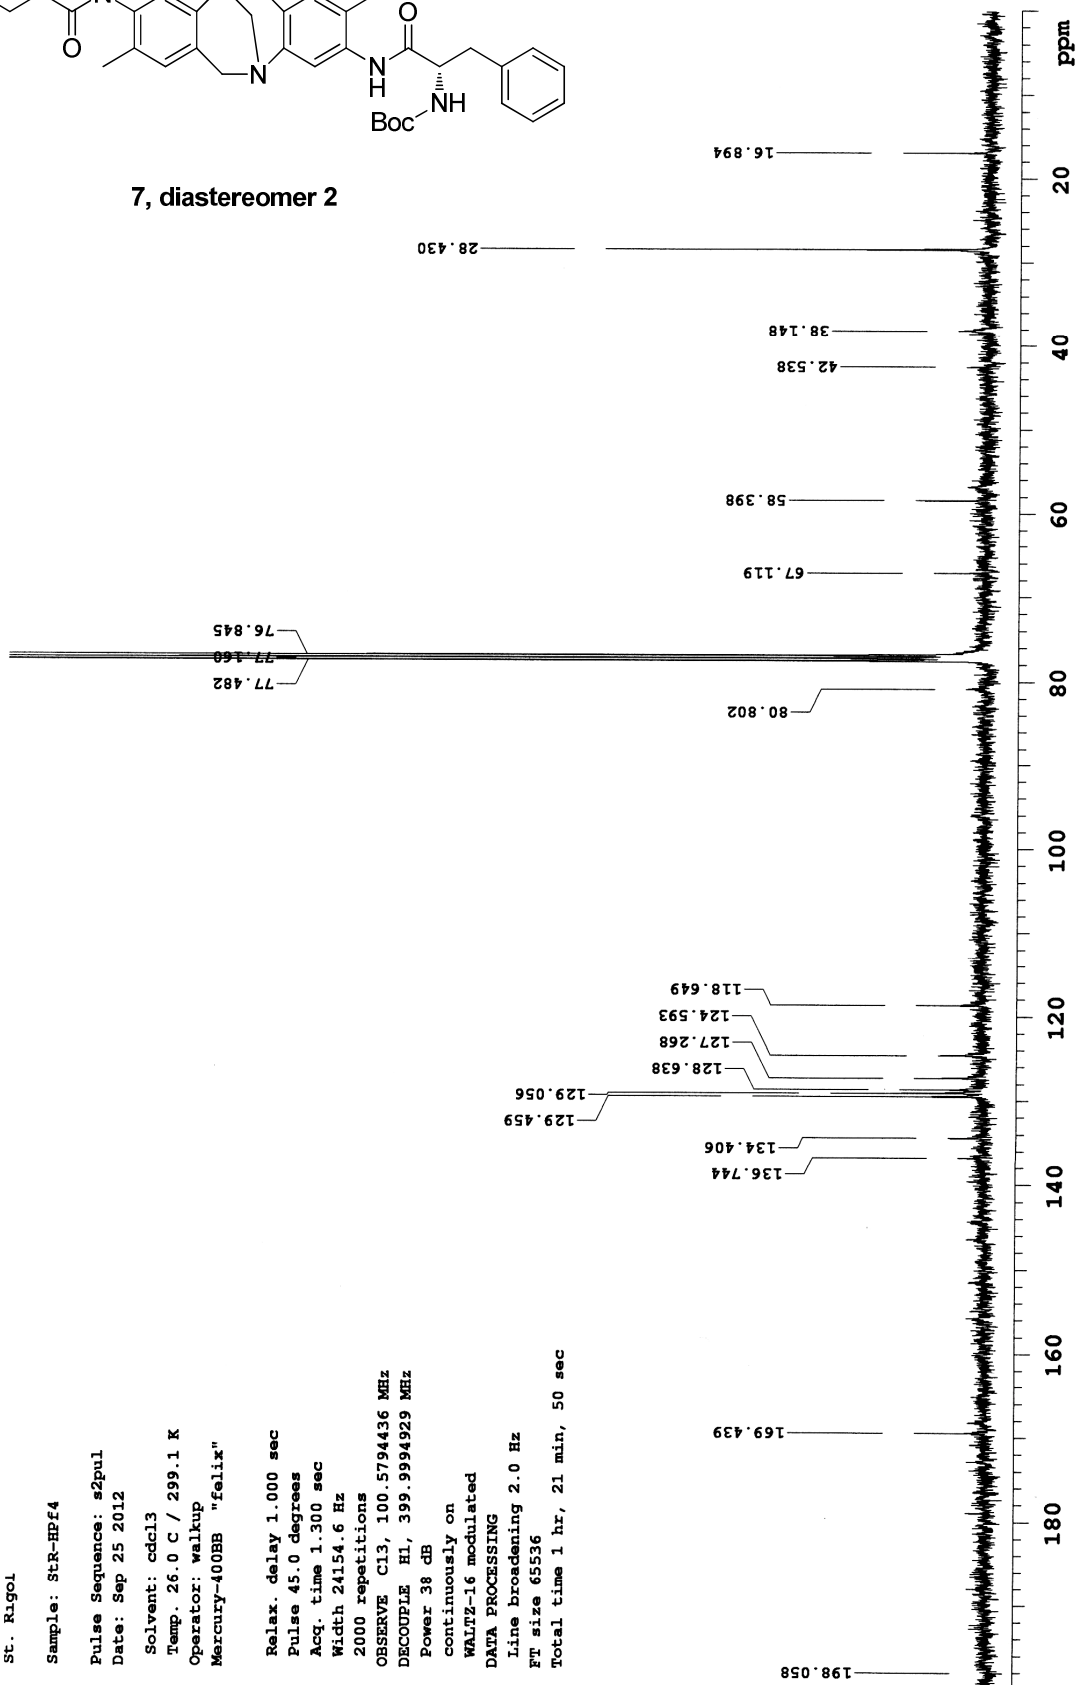

St. Rigol

Sample: Str-HPf4

Pulse Sequence: s2pul

Date: Sep 25 2012

Solvent: cdcl3

Temp. 26.0 C / 299.1 K

Operator: walkup

Mercury-400BB "felix"

Relax. delay 1.000 sec

Pulse 45.0 degrees

Acq. time 1.300 sec

Width 24154.6 Hz

2000 repetitions

OBSERVE C13, 100.579436 MHz

DECOUPLE H1, 399.9994929 MHz

Power 38 dB

continuously on

WALTZ-16 modulated

DATA PROCESSING

Line broadening 2.0 Hz

FT size 65536

Total time 1 hr, 21 min, 50 sec

S. Rigol

Sample: StR-HVDS1

Pulse Sequence: s2pul

Solvent: cdcl3

Temp. 26.0 C / 299.1 K

Operator: vmmrl

Mercury-300BB "jutta"

Relax. delay 1.000 sec

Pulse 29.7 degrees

Acq. time 1.998 sec

Width 4800.8 Hz

20 repetitions

OBSERVE H1, 300.0816988 MHz

DATA PROCESSING

Line broadening 0.2 Hz

FT size 32768

Total time 1 min, 47 sec

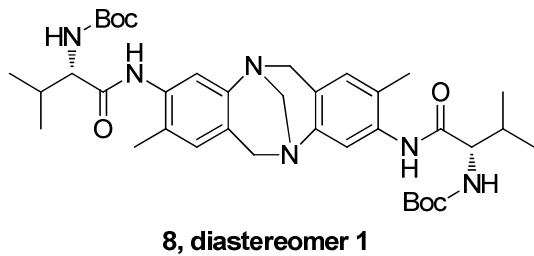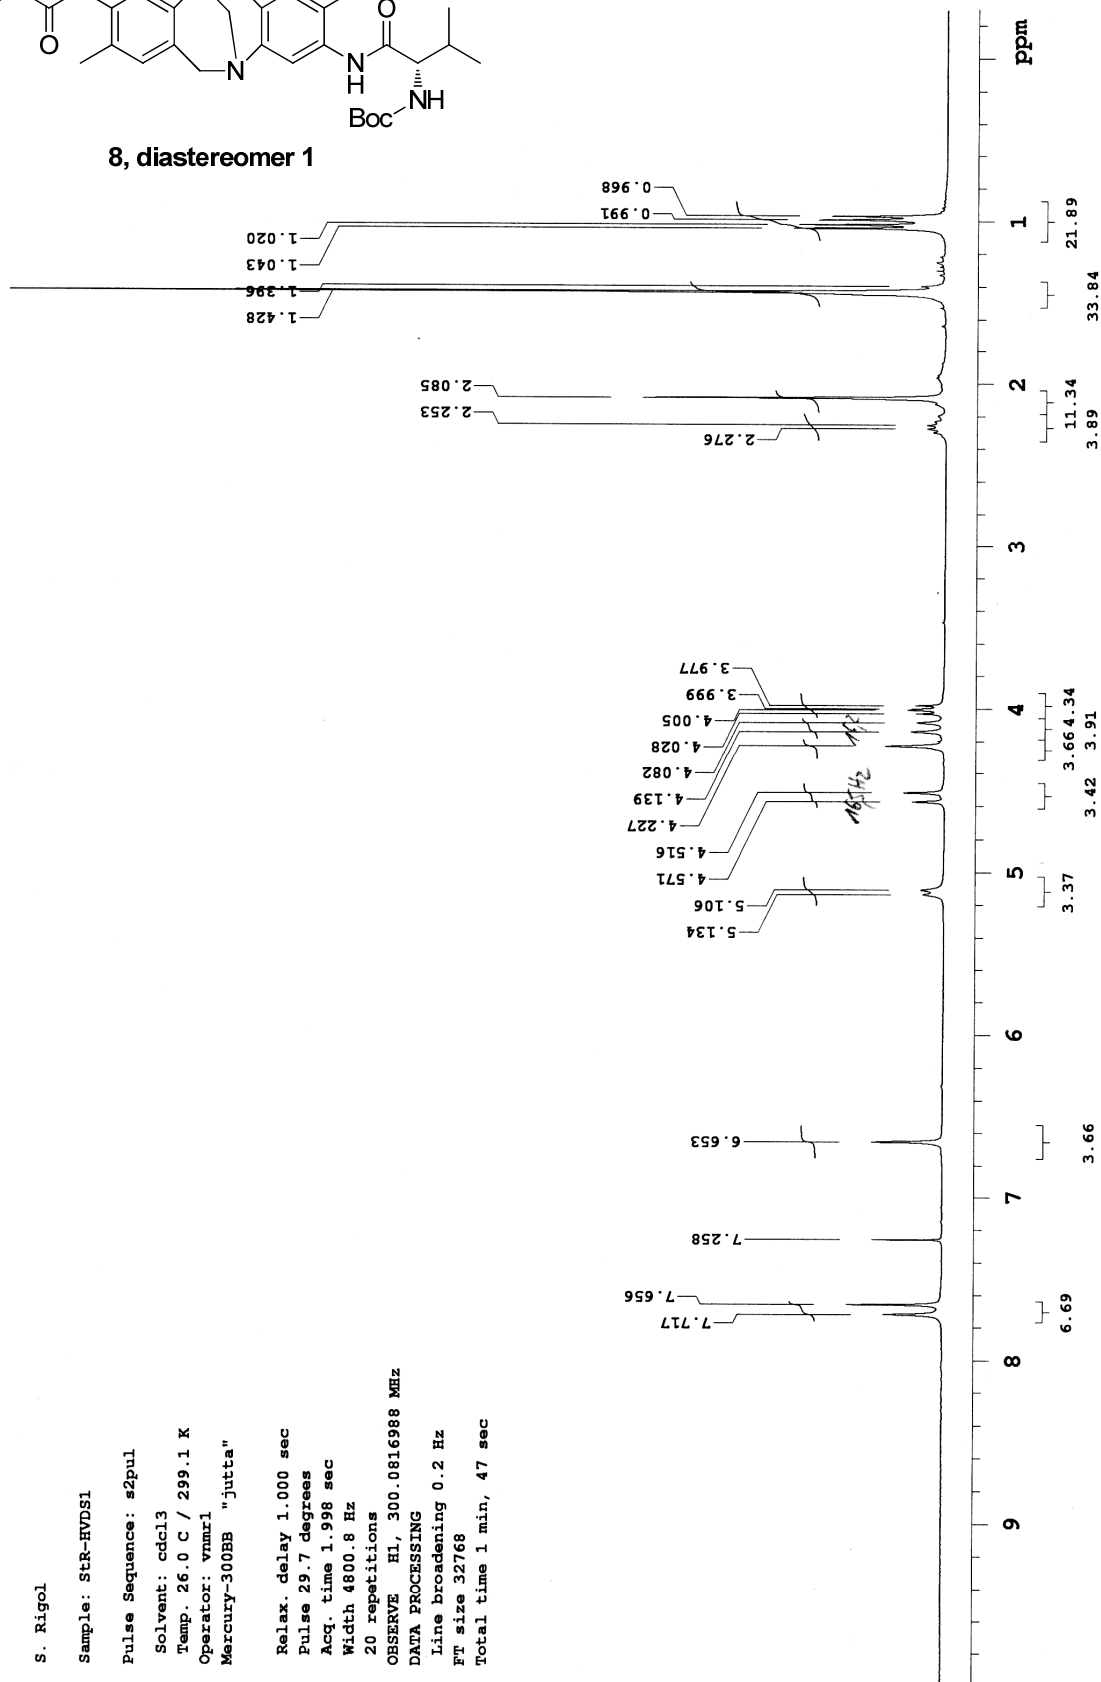

St. Rigol

Sample: StR-HVDS1

Pulse Sequence: s2pul

Solvent: cdcl3

Temp. 26.0 C / 299.1 K

Operator: vmmr1

Mercury-300BB "jutta"

Relax. delay 1.000 sec

Pulse 45.0 degrees

Acq. time 1.301 sec

Width 18115.9 Hz

848 repetitions

OBSERVE C13, 75.4555922 MHz

DECOUPLE H1, 300.0831467 MHz

Power 37 dB

continuously on

WALTZ-16 modulated

DATA PROCESSING

Line broadening 0.5 Hz

FT size 65536

Total time 1 hr, 24 min, 1 sec

8, diastereomer 1

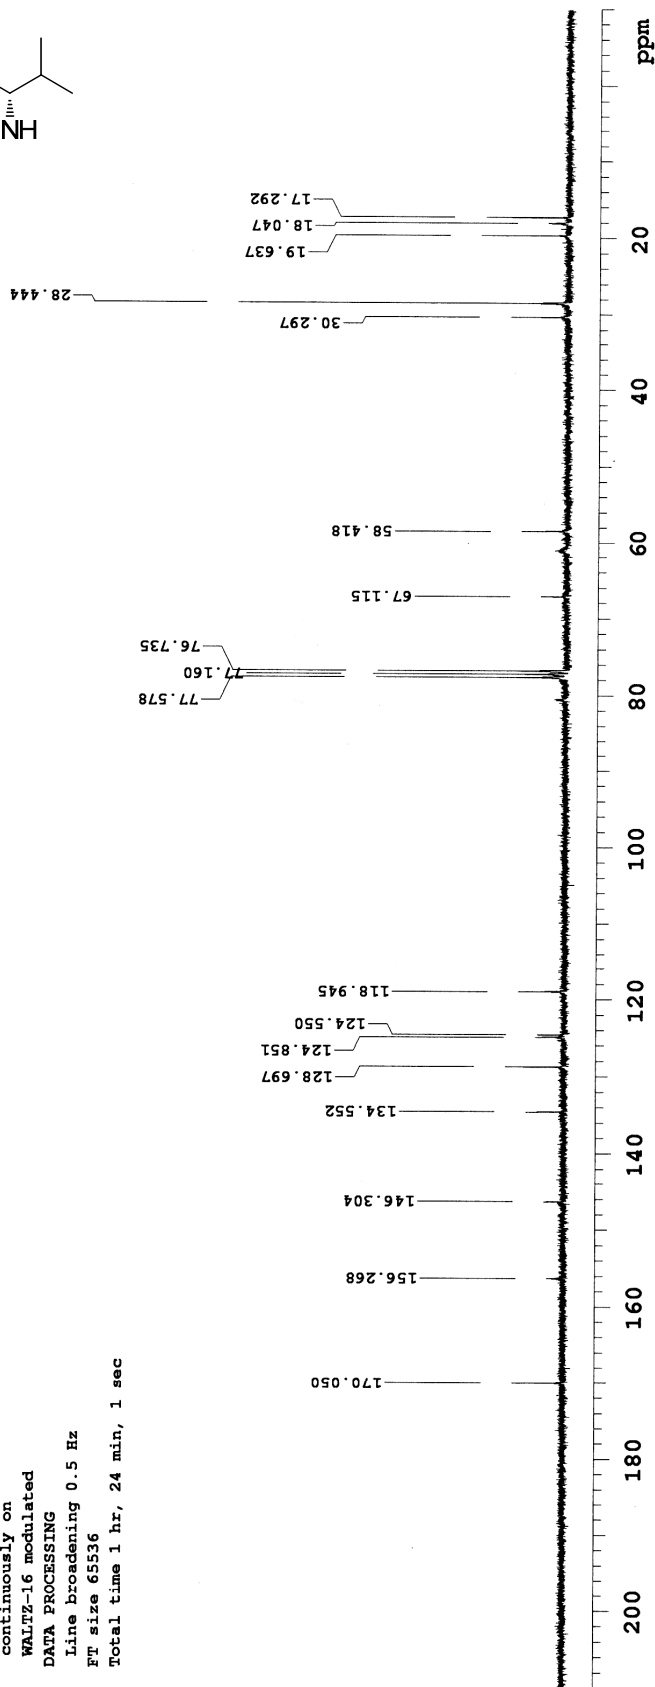

S. Rigol

Sample: StR-ValDS2

Pulse Sequence: s2pul

Date: Dec 13 2012

Solvent: cdcl3

Temp. 26.0 C / 299.1 K

Operator: walkup

File: STRVALDS2H

Mercury-400BB "felix"

Relax. delay 1.000 sec

Pulse 29.7 degrees

Acq. time 1.996 sec

Width 6398.0 Hz

24 repetitions

OBSERVE H1, 399.9975360 MHz

DATA PROCESSING

Line broadening 0.2 Hz

FT size 32768

Total time 1 min, 50 sec

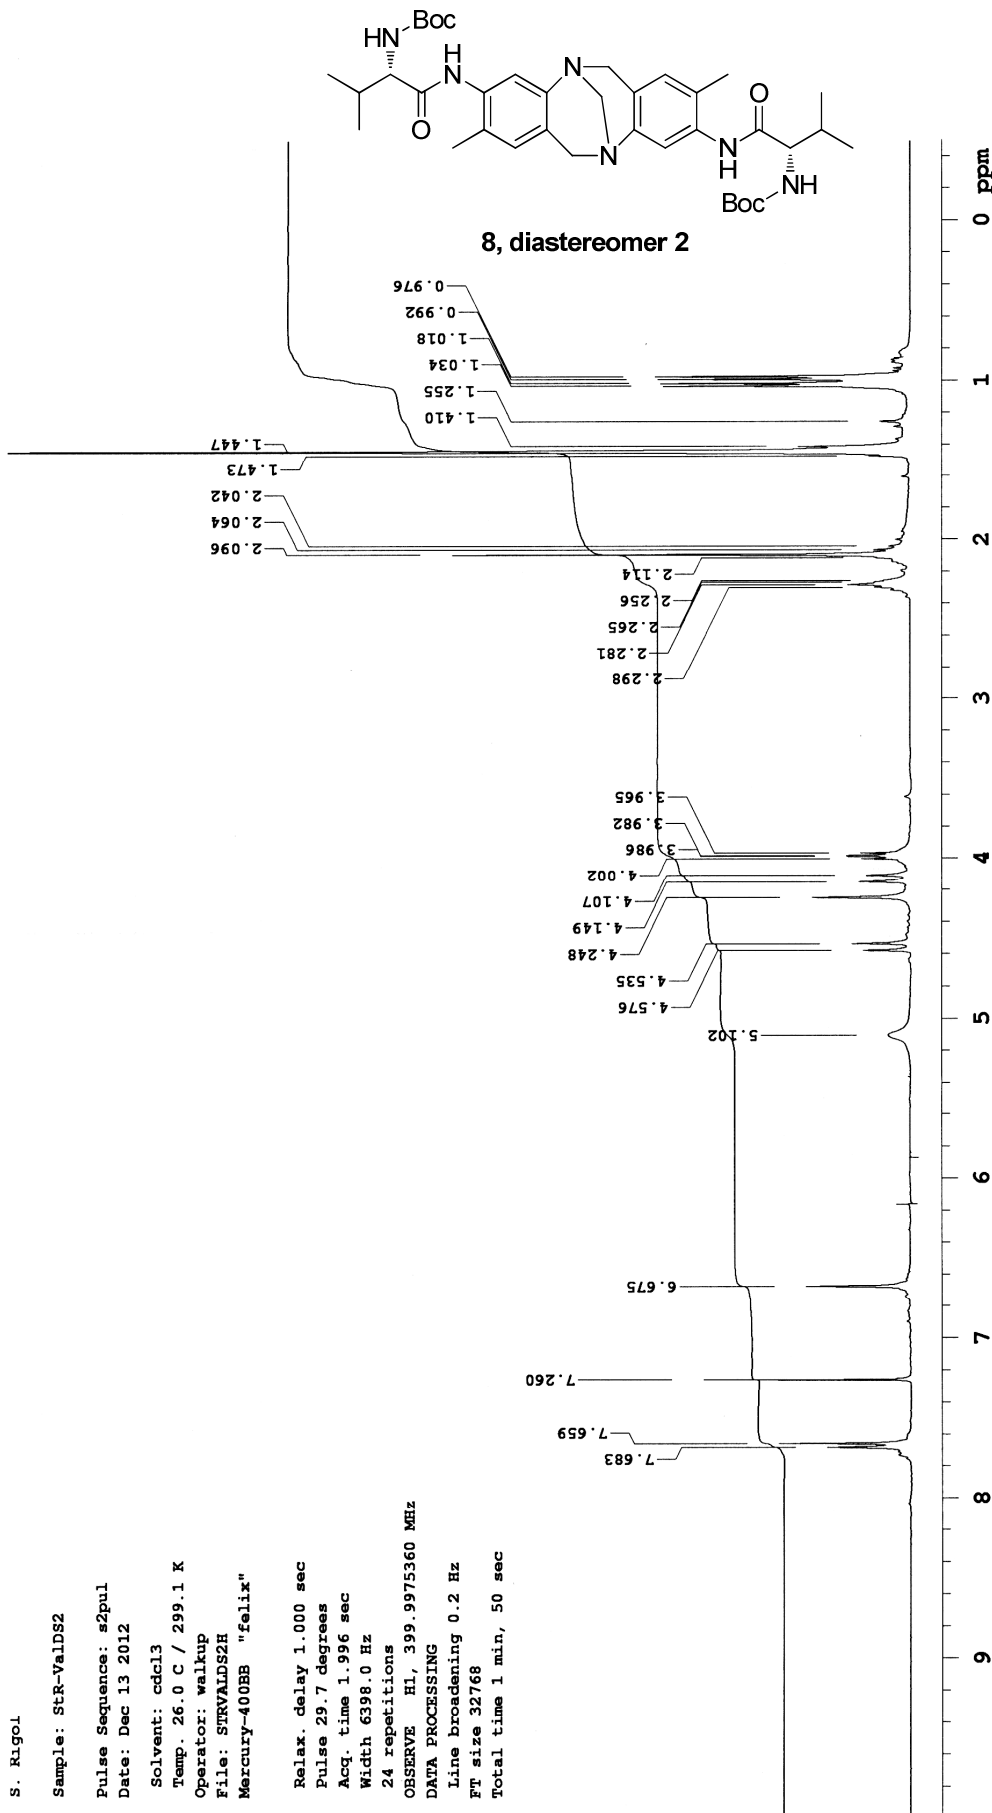

S. Rigol

Sample: Str-ValDS2

Pulse Sequence: s2pul

Date: Dec 13 2012

Solvent: cdcl3

Temp. 26.0 C / 299.1 K

Operator: walkup

File: STRVALDS2C

Mercury-400BB "felix"

Relax. delay 1.000 sec

Pulse 45.0 degrees

Acq. time 1.300 sec

Width 24154.6 Hz

1904 repetitions

OBSERVE C13, 100.5794451 MHz

DECOUPLE H1, 399.9994929 MHz

Power 38 dB

continuously on

WALTZ-16 modulated

DATA PROCESSING

Line broadening 2.0 Hz

FT size 65536

Total time 1 hr, 25 min, 53 sec

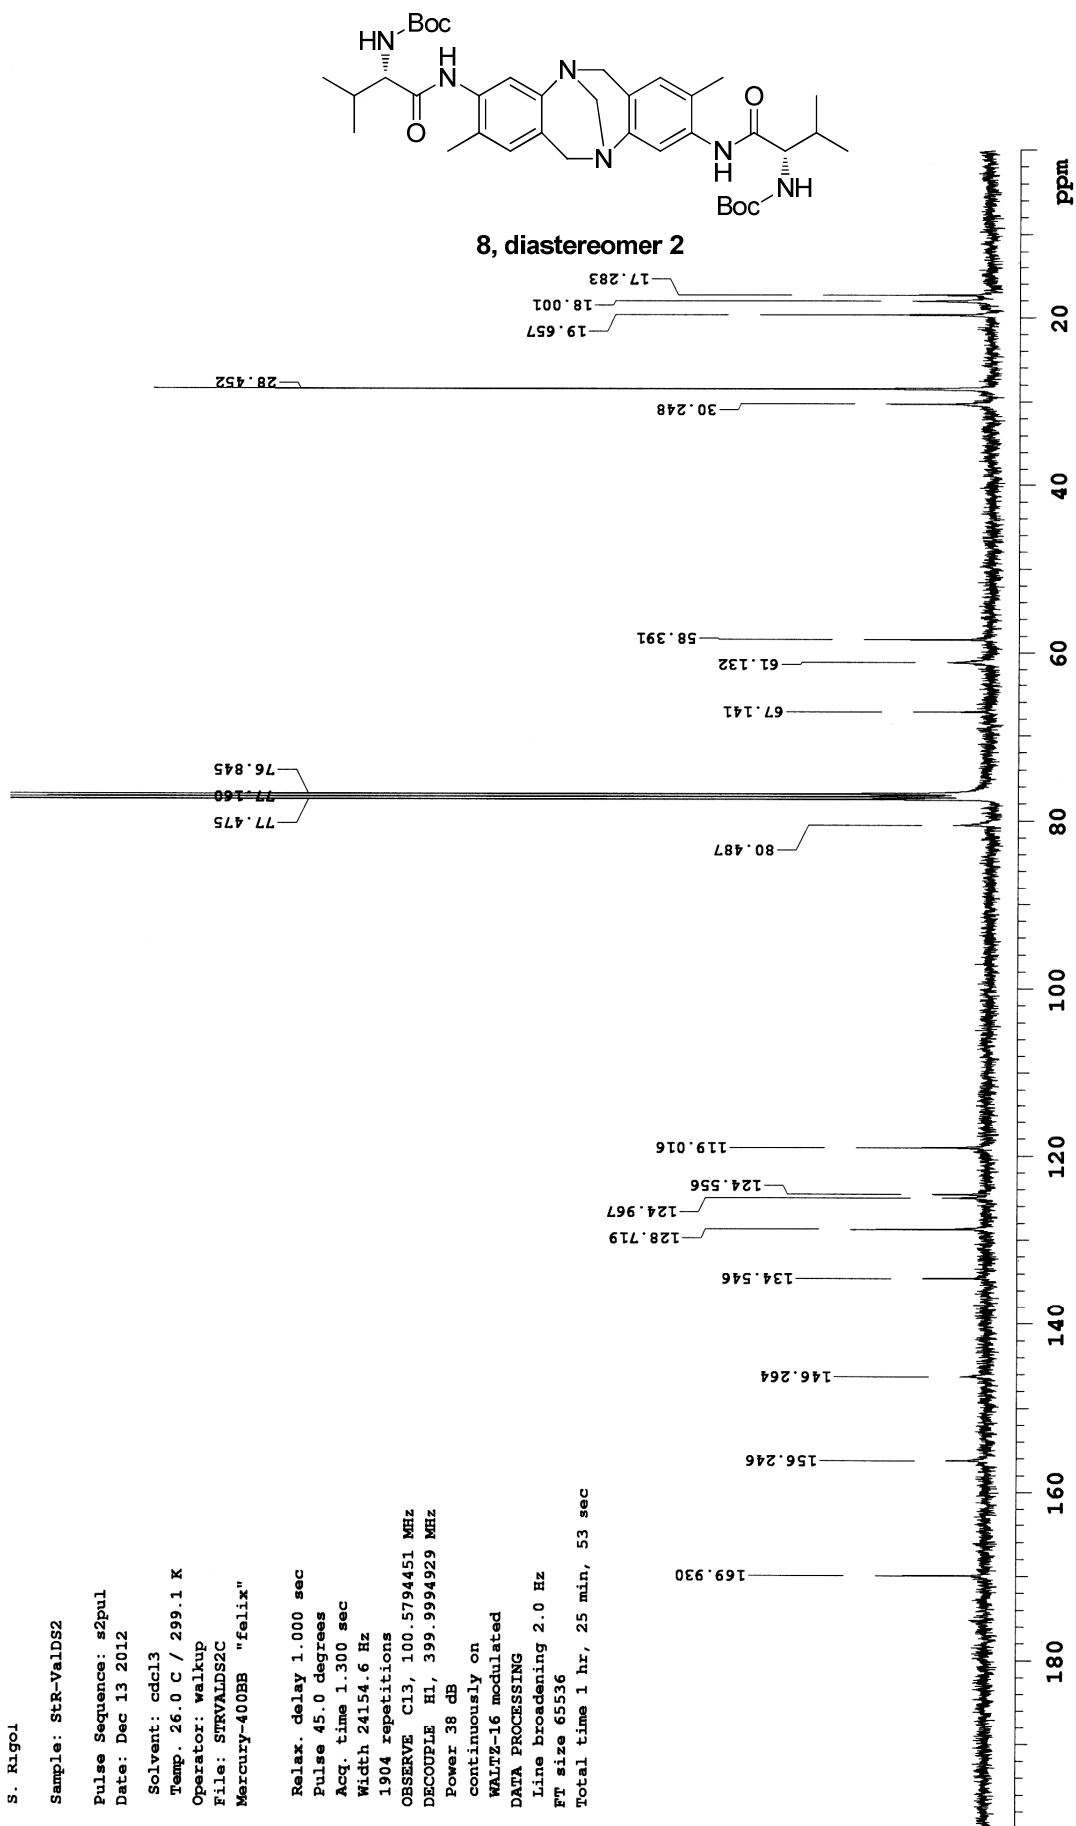

K. Richter

Sample: Kari 5-30

Pulse Sequence: s2pul

Solvent: cdcl3

Temp. 26.0 C / 299.1 K

Operator: vmrl

Mercury-300EB "jutta"

Relax. delay 1.000 sec

Pulse 29.7 degrees

Acq. time 1.998 sec

Width 4800.8 Hz

32 repetitions

OBSERVE H1, 300.0817101 MHz

DATA PROCESSING

line broadening 0.2 Hz

FT size 32768

Total time 1 min, 47 sec

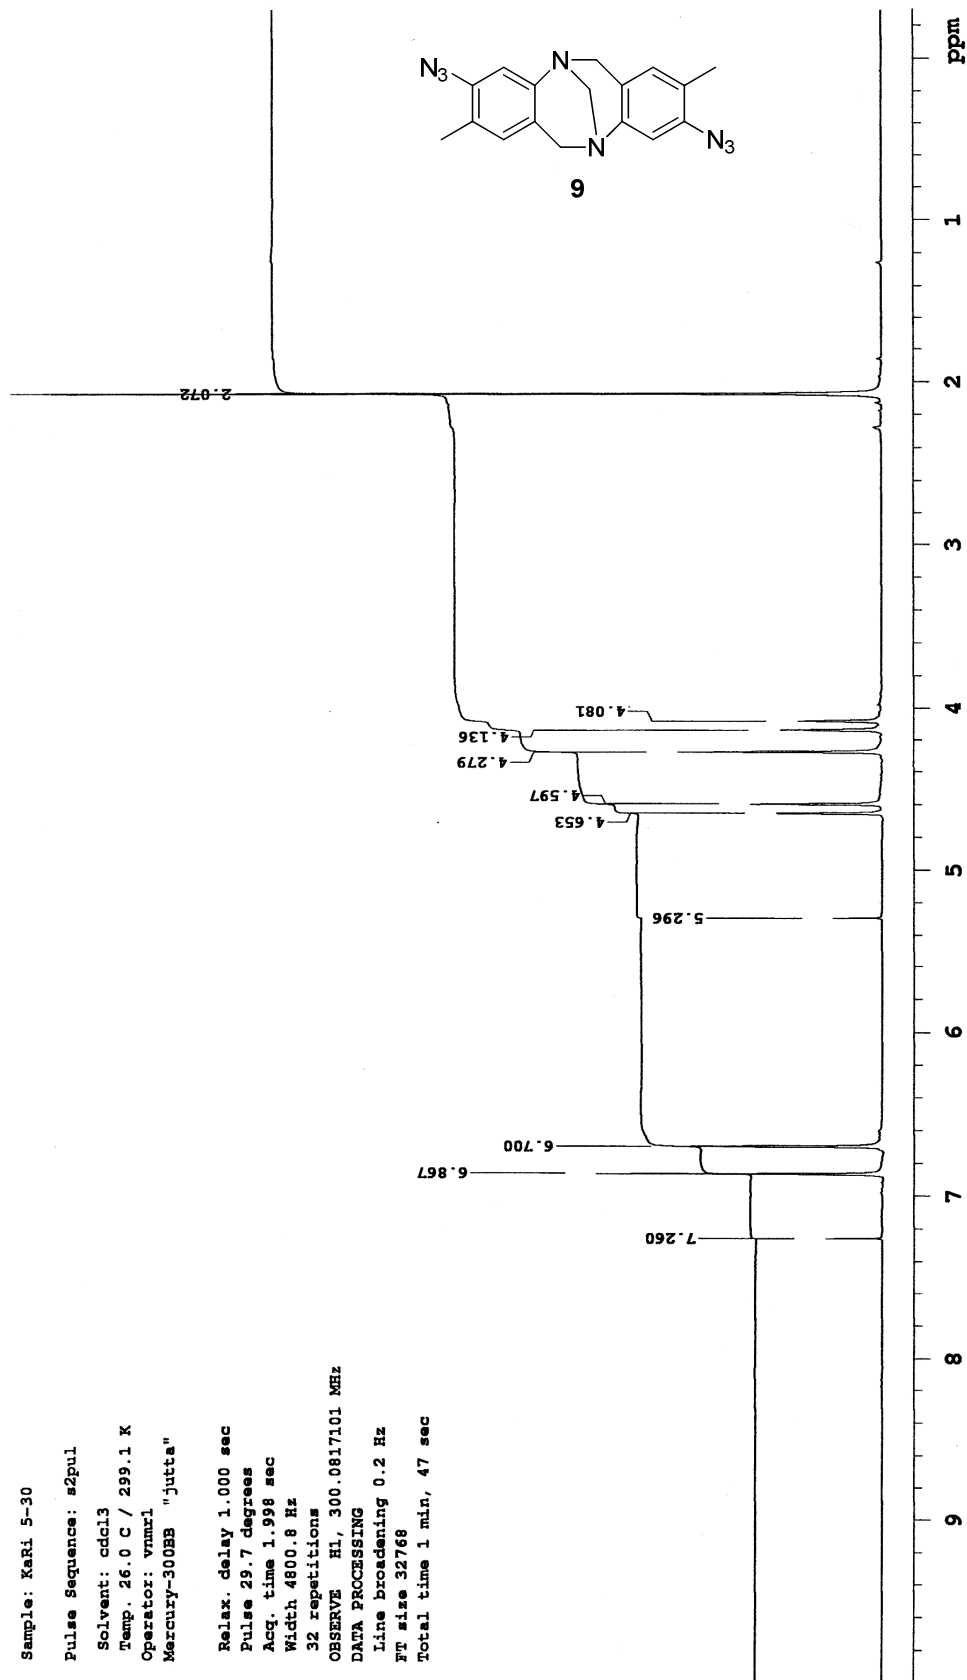



Std Carbon experiment

Sample: KaXi 5-30

Pulse Sequence: s2pul

Solvent: cdcl3  
Temp. 26.0 C / 299.1 K  
Operator: vmr1  
Mercury-300BB "jutta"

Relax. delay 1.000 sec  
Pulse 45.0 degrees  
Acq. time 1.301 sec  
Width 18115.9 Hz

224 repetitions  
OBSERVE C13, 75.4555946 MHz  
DECOUPLE H1, 300.0832710 MHz

Power 37 dB

continuously on  
WALTZ-16 modulated

DATA PROCESSING

Line broadening 1.0 Hz  
FT size 65536  
Total time 40 min, 28 sec

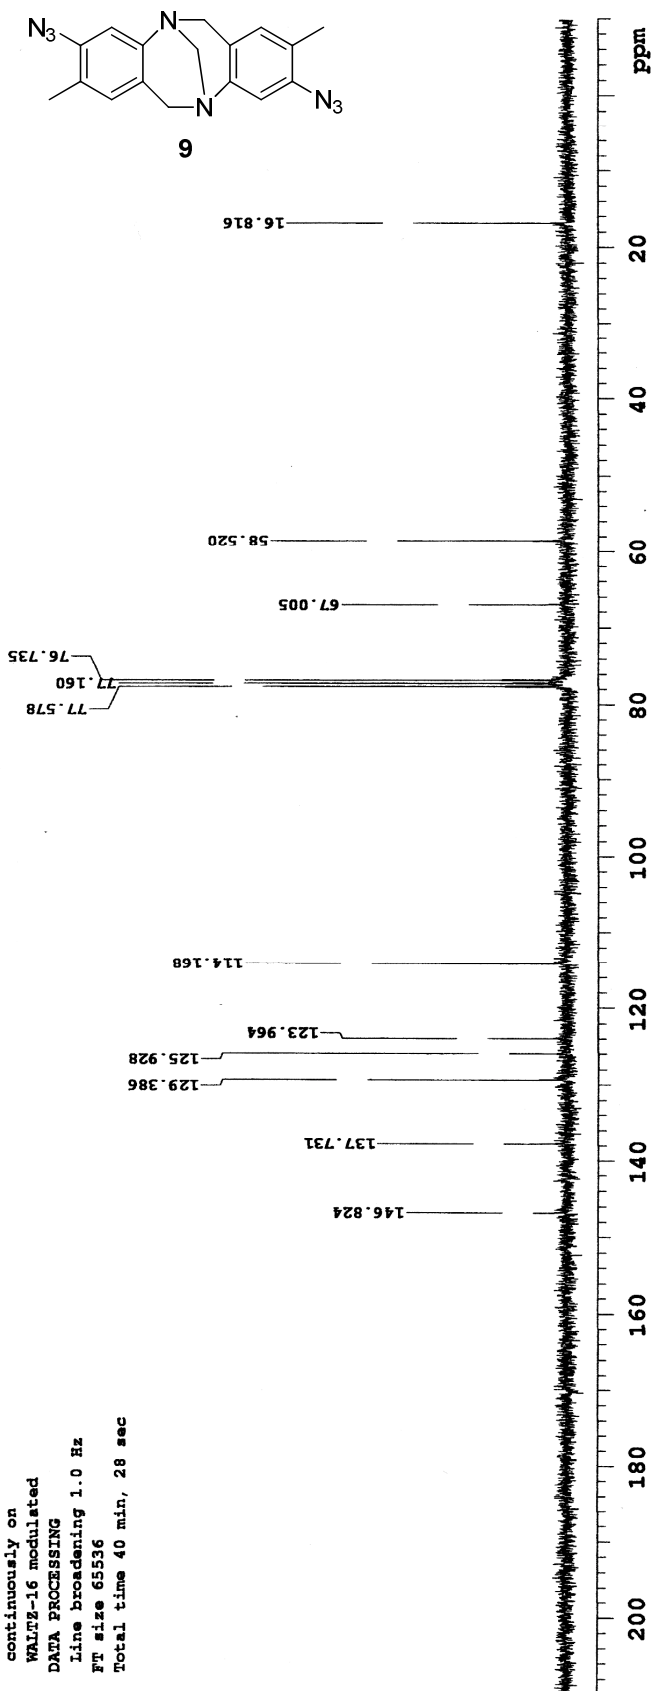

S. Ragol

Sample: StR-307

Pulse Sequence: s2pul  
Date: Apr 13 2012

Solvent: cdcl3  
Temp. 26.0 C / 299.1 K  
Operator: walkup  
Mercury-400BB "felix"

Relax. delay 1.000 sec  
Pulse 29.7 degrees  
Acq. time 1.996 sec  
Width 6398.0 Hz  
32 repetitions

OBSERVE H1, 399.9975363 MHz  
DATA PROCESSING  
Line broadening 0.2 Hz  
FT size 32768  
Total time 1 min, 50 sec

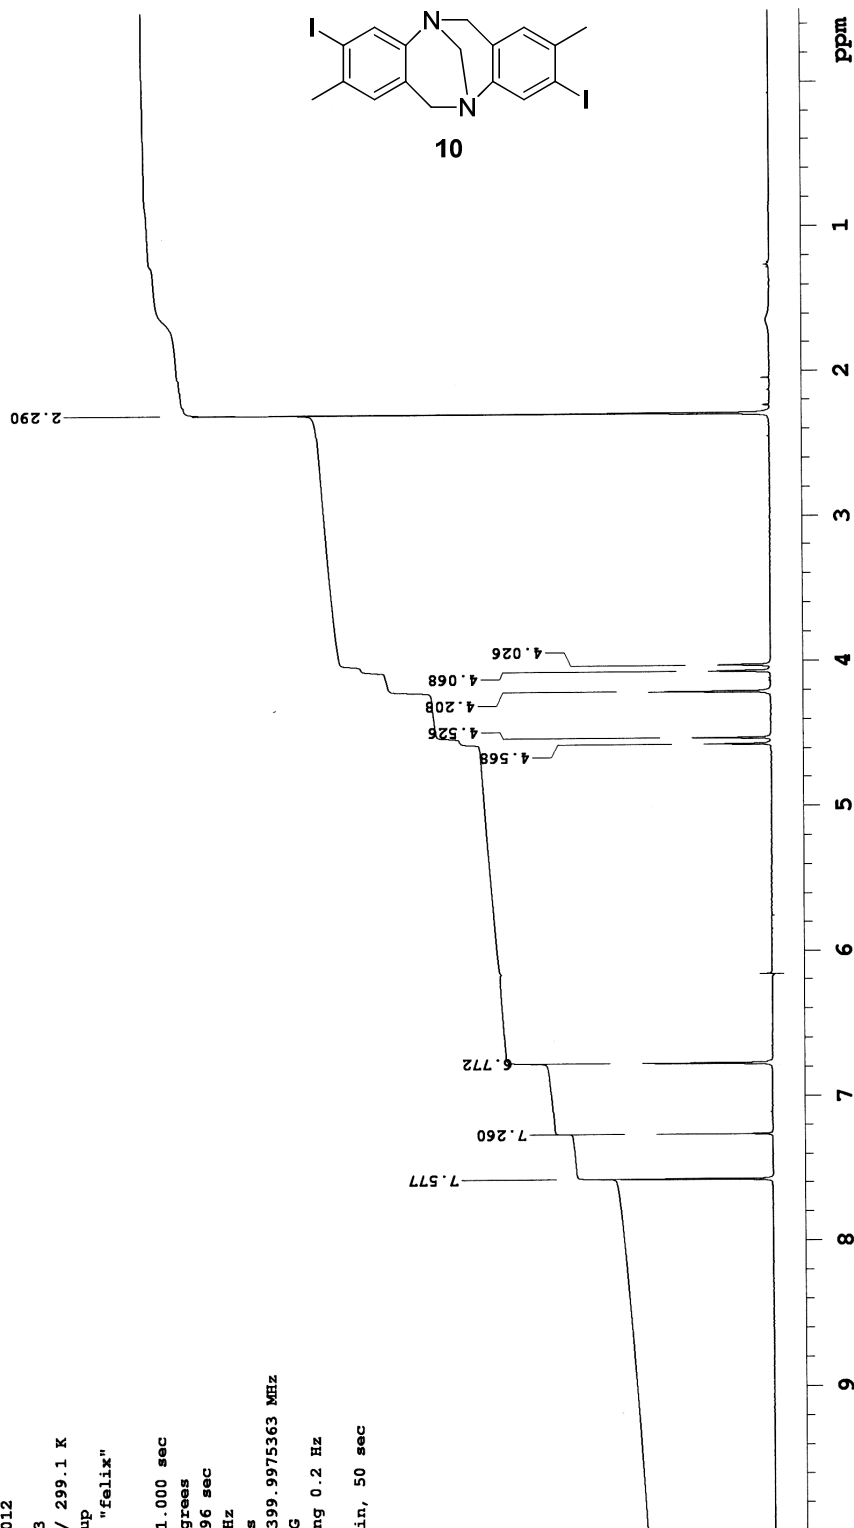

S.Rigol

Sample: Str-307

Pulse Sequence: s2pul  
Date: Apr 13 2012

Solvent: cdcl3  
Temp. 26.0 C / 299.1 K  
Operator: walkup  
Mercury-400BB "felix"

Relax. delay 1.000 sec  
Pulse 45.0 degrees  
Acq. time 1.300 sec  
Width 24154.6 Hz  
304 repetitions  
OBSERVE C13, 100.5794443 MHz  
DECOUPLE H1, 399.9994929 MHz  
Power 38 dB  
continuously on  
WALTZ-16 modulated  
DATA PROCESSING  
Line broadening 0.5 Hz  
FT size 65536  
Total time 42 min, 58 sec

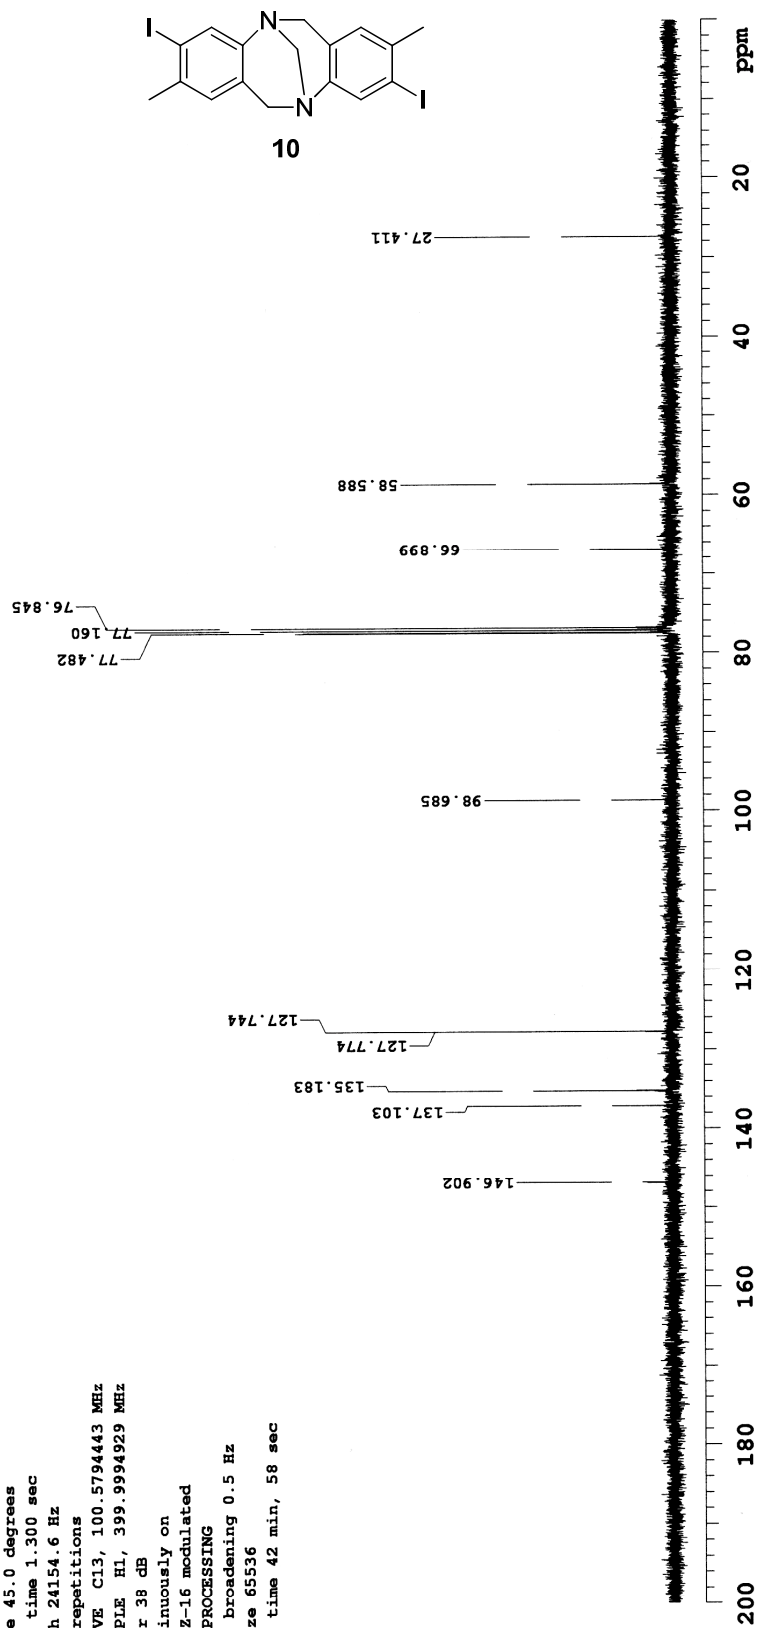

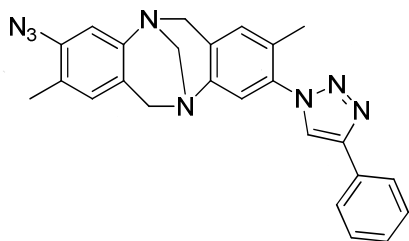

11

J. Krieger

Sample: JoKr-7d

Pulse Sequence: s2pul

Solvent: cdcl3

Temp. 26.0 C / 299.1 K

Operator: vnmr1

Mercury-300BB "jutta"

Relax. delay 1.000 sec.

Pulse 29.7 degrees

Acq. time 1.998 sec

Width 4800.8 Hz

32 repetitions

OBSERVE H1, 300.0817101 MHz

DATA PROCESSING

Line broadening 0.2 Hz

FT size 32768

Total time 1 min, 47 sec

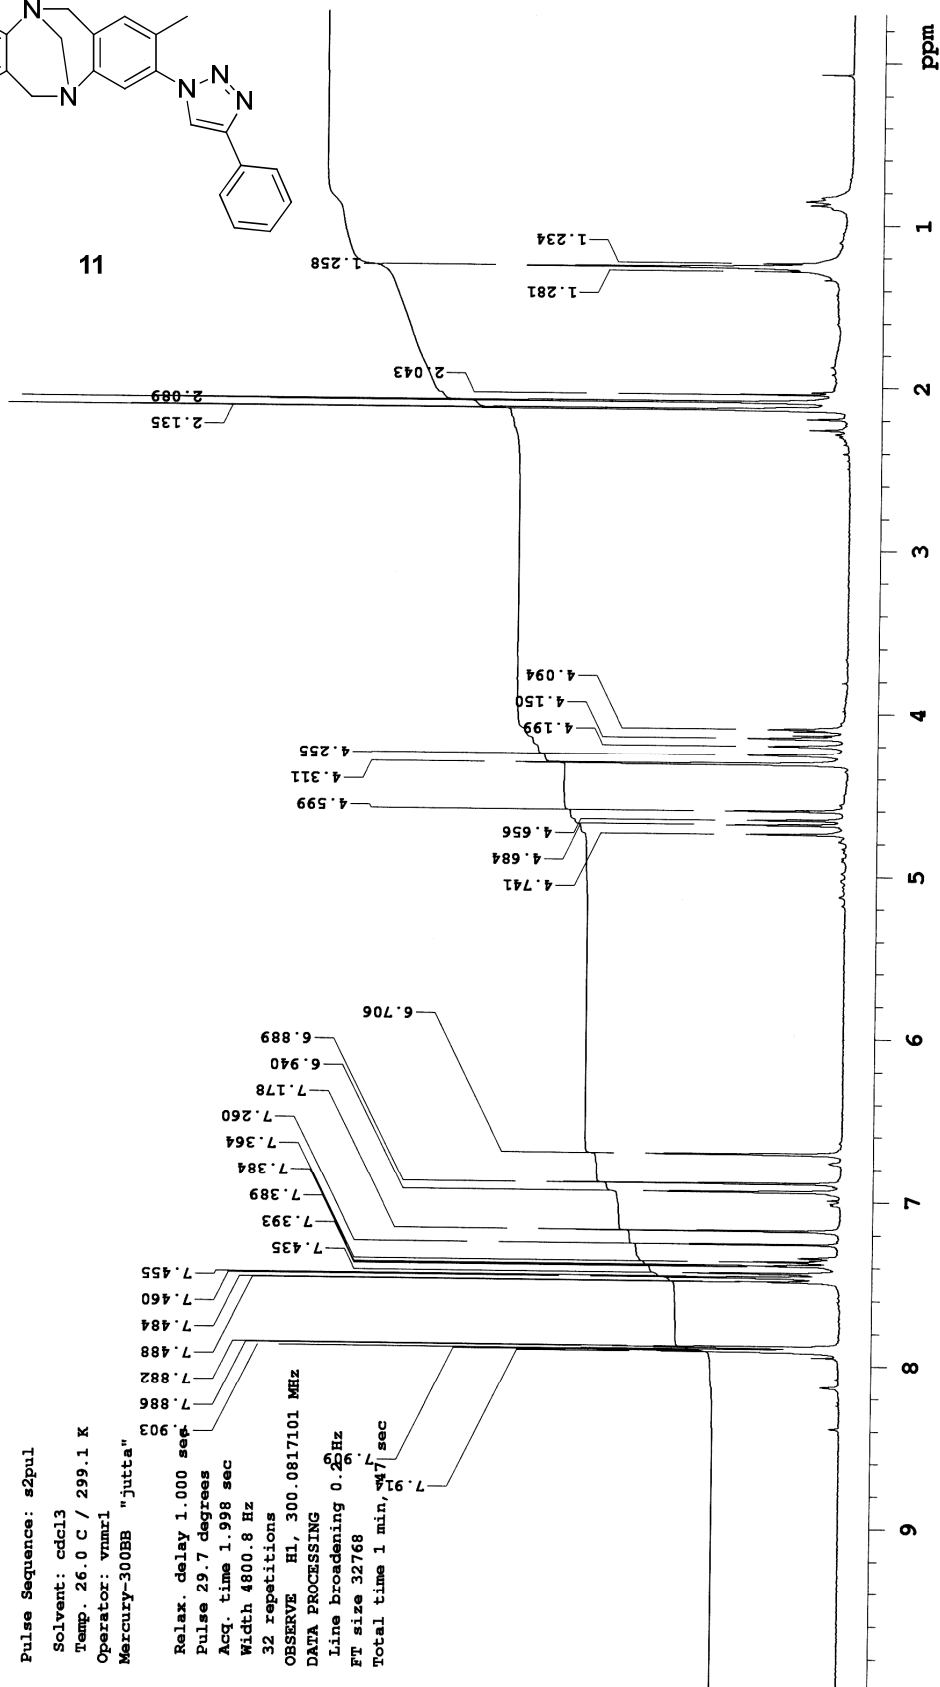

Std Carbon experiment

Sample: JOKR-7d

Pulse Sequence: s2pul

Solvent: cdcl3

Temp. 26.0 C / 299.1 K

Operator: vnmr1

Mercury-300BB "jutta"

Relax. delay 1.000 sec

Pulse 45.0 degrees

Acq. time 1.301 sec

Width 18115.9 Hz

512 repetitions

OBSERVE C13, 75.4555940 MHz

DECOUPLE H1, 300.0832710 MHz

Power 37 dB

continuously on

WALTZ-16 modulated

DATA PROCESSING

Line broadening 1.0 Hz

FT size 65536

Total time 21 min, 30 sec

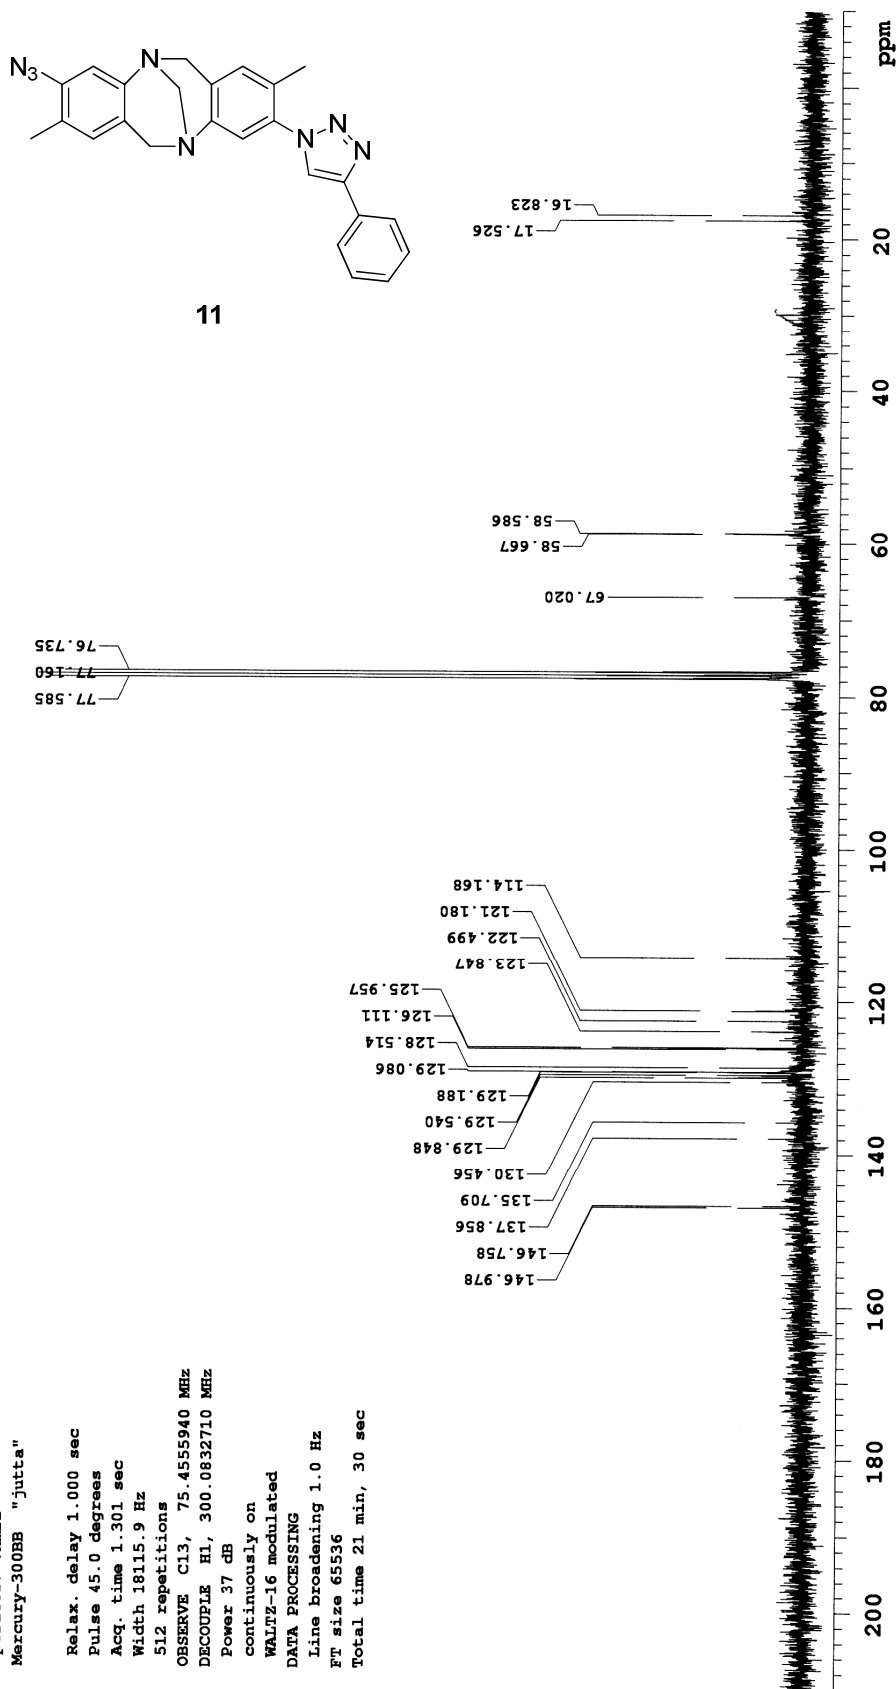

Sample: JoKr-14a

Pulse Sequence: s2pul

Solvent: cdcl3

Temp. 26.0 C / 299.1 K

Operator: vmr1

Mercury-300BB "jutta"

Relax. delay 1.000 sec

Pulse 29.7 degrees

Acq. time 1.998 sec

Width 4800.8 Hz

20 repetitions

OBSERVE H1, 300.0816984 MHz

DATA PROCESSING

Line broadening 0.2 Hz

FT size 32768

Total time 3 min, 35 sec

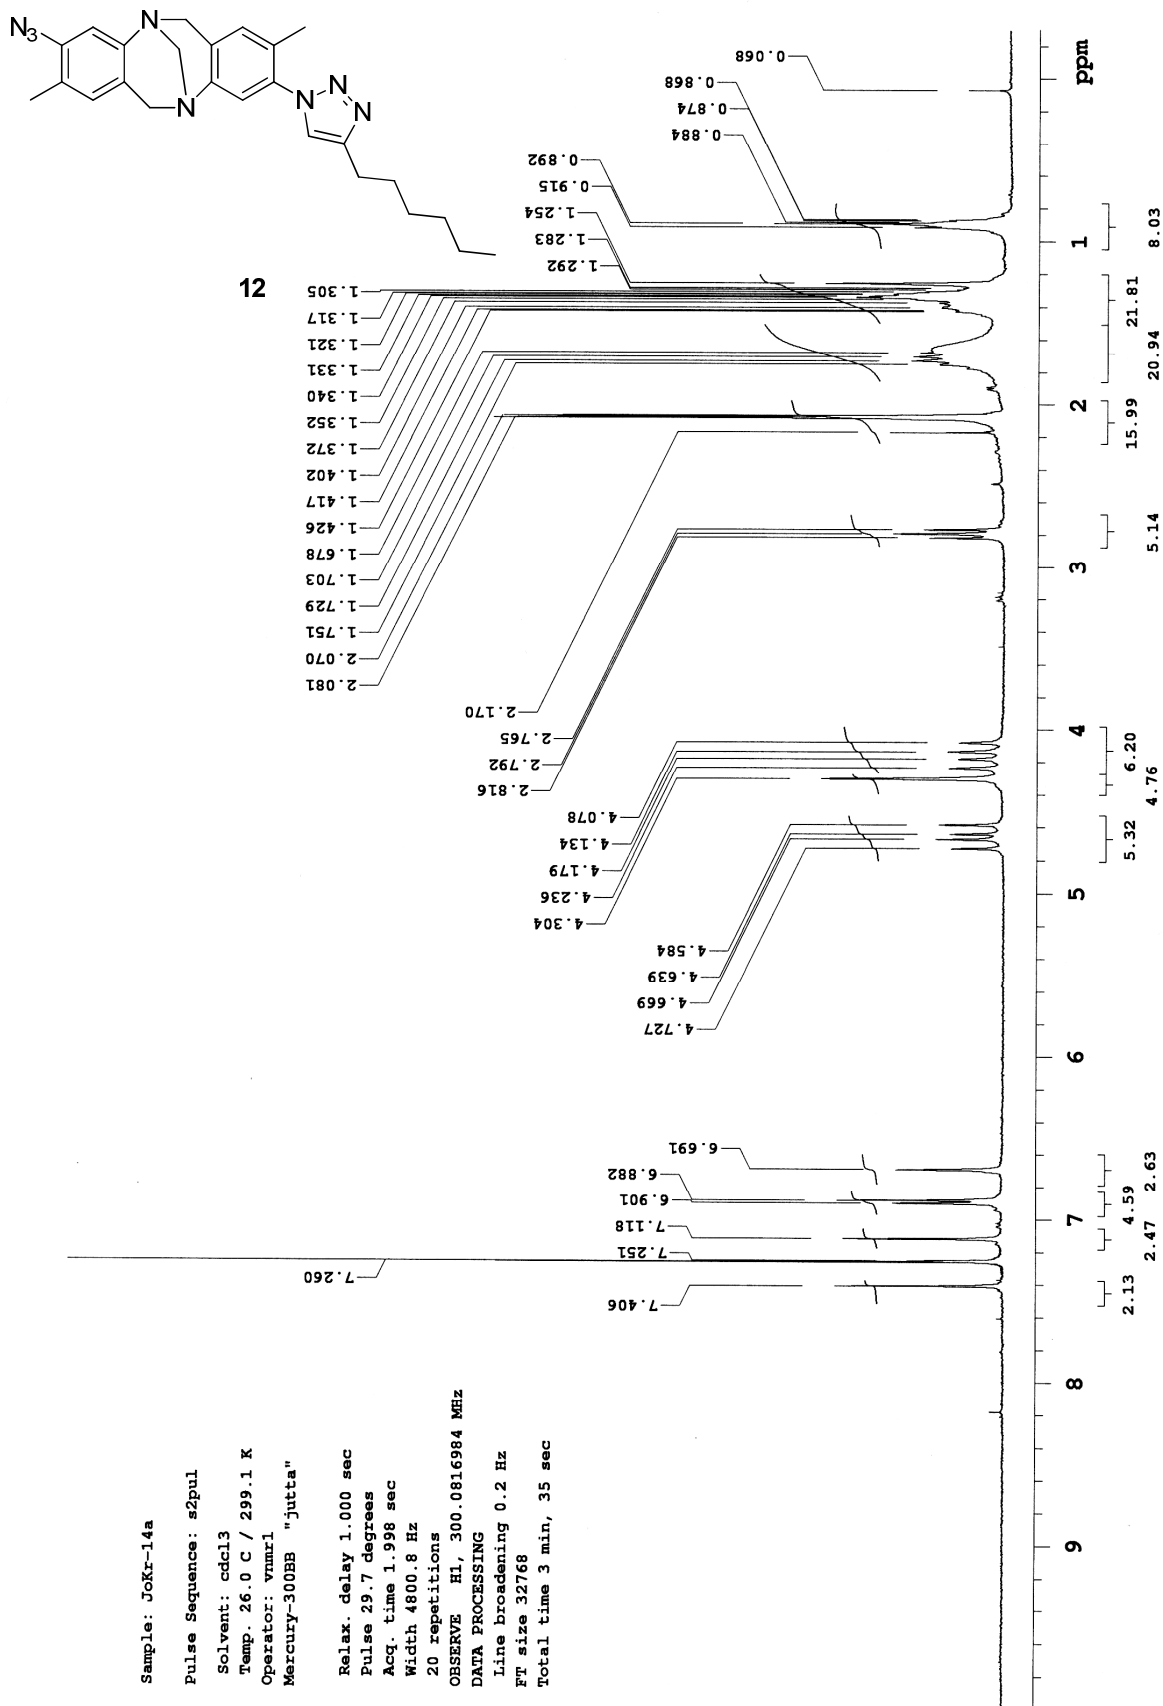

J. Krieger

Sample: JoKr-14a

Pulse Sequence: s2pul

Date: Sep 27 2012

Solvent: cdcl3

Temp. 26.0 C / 299.1 K

Operator: walkup

File: JOKR14AC

Mercury-400BB "felix"

Relax. delay 1.000 sec

Pulse 45.0 degrees

Acq. time 1.300 sec

Width 24154.6 Hz

2000 repetitions

OBSERVE C13, 100.579465 MHz

DECOUPLE H1, 399.9994929 MHz

Power 38 dB

continuously on

WALTZ-16 modulated

DATA PROCESSING

Line broadening 1.0 Hz

FT size 65536

Total time 1 hr, 21 min, 50 sec

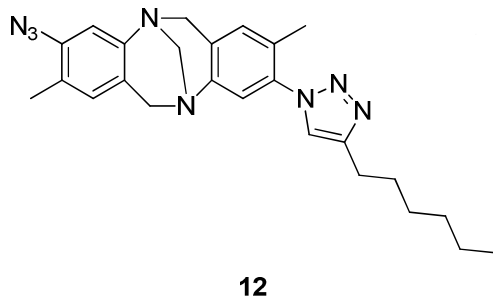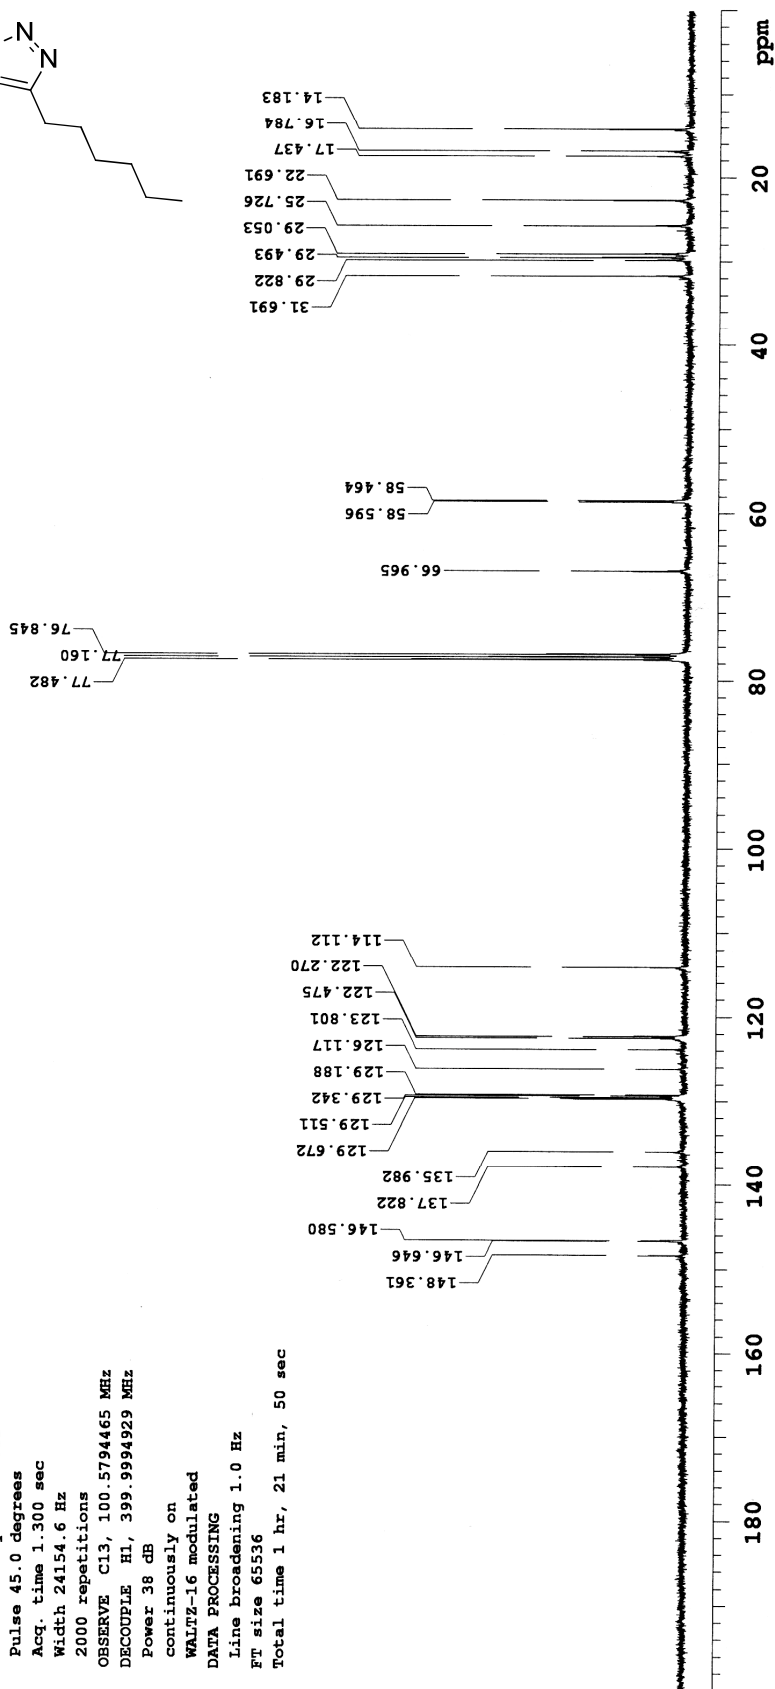

Supplement: Supplementary file 1 [file 4076716]
